# Supplementary material for: Development of light-emitting liquid-crystalline polymers with a pentafluorinated bistolane-based luminophore
Source: Royal Society of Chemistry journal article supplement (doi:10.1039/d0nj00659a), 2020-01-01
Supplement: d0nj00659a1.pdf [file d0nj00659a1.pdf]

# ***Electronic Supplementary Information***

## **Development of light-emitting liquid-crystalline polymers with a pentafluorinated bistolane-based luminophore**

Shigeyuki Yamada,<sup>a,\*</sup> Akira Mitsuda,<sup>a</sup> Kaoru Adachi,<sup>a</sup> Mitsuo Hara,<sup>b</sup> Tsutomu Konno <sup>a</sup>

<sup>a</sup>Faculty of Molecular Chemistry and Engineering, Kyoto Institute of Technology, Matsugasaki, Sakyo-ku, Kyoto 606-8585, Japan; TEL: +81-75-724-7517 / Email: syamada@kit.ac.jp

<sup>b</sup>Graduate School of Engineering, Nagoya University, Furo-cho, Chikusa-ku, Nagoya 464-8603, Japan

### **Contents**

|                                                                                                                           |            |
|---------------------------------------------------------------------------------------------------------------------------|------------|
| 1. Experimental procedure                                                                                                 | ..... S-2  |
| 2. NMR spectra                                                                                                            | ..... S-9  |
| 3. GPC analysis                                                                                                           | ..... S-30 |
| 4. TG analysis                                                                                                            | ..... S-31 |
| 5. DSC measurement                                                                                                        | ..... S-32 |
| 6. POM measurement                                                                                                        | ..... S-33 |
| 7. PXRD measurement at 150 °C (LC phases)                                                                                 | ..... S-34 |
| 8. Photophysical properties in CH <sub>2</sub> Cl <sub>2</sub> solution                                                   | ..... S-35 |
| 9. Photophysical properties of <b>P-2e</b> in various solution                                                            | ..... S-36 |
| 10. Photophysical properties in the pristine solid state                                                                  | ..... S-37 |
| 11. Photophysical properties of <b>P<sub>B-D</sub>-2e</b> with various <i>M<sub>n</sub></i> and PDI in solid state        | ..... S-38 |
| 12. Photophysical property of <b>P-2a–e</b> in the Sm phase                                                               | ..... S-39 |
| 13. Comparison for photophysical properties of <b>P-2</b><br>in CH <sub>2</sub> Cl <sub>2</sub> , solid, and Sm LC phases | ..... S-40 |

## 1. Experimental procedure

### 1-1. General

$^1\text{H}$  and  $^{13}\text{C}$  NMR spectra were obtained with a Bruker AVANCE III 400 NMR spectrometer ( $^1\text{H}$ : 400 MHz and  $^{13}\text{C}$ : 100 MHz) in chloroform-*d* ( $\text{CDCl}_3$ ) solution and the chemical shifts are reported in parts per million (ppm) using the residual proton in the NMR solvent.  $^{19}\text{F}$  NMR (376 MHz) spectra were obtained with a Bruker AVANCE III 400 NMR spectrometer in  $\text{CDCl}_3$  solution with  $\text{CFCl}_3$  ( $\delta_{\text{F}} = 0$  ppm) as an internal standard. Infrared spectra (IR) were recorded in a KBr method with a JASCO FT/IR-4100 type A spectrometer; all spectra were reported in wavenumber ( $\text{cm}^{-1}$ ). High resolution mass spectra (HRMS) were recorded on a JEOL JMS700MS spectrometer using fast atom bombardment (FAB) methods. All chemicals including solvent were of reagent grade and where necessary were purified in the usual manner prior to use. Column chromatography was carried out on silica gel (Wakogel® 60N, 38–100  $\mu\text{m}$ ) and thin-layer chromatography (TLC) analysis was performed on silica gel TLC plates (Merck, Silica gel 60F<sub>254</sub>). The number average molecular weight ( $M_n$ ), weight average molecular weight ( $M_w$ ), molecular weight distribution ( $M_w/M_n$ ) were estimated by gel-permeation chromatography (GPC, TOSOH HLC-8320GPC system) using chloroform as an eluent with polystyrene standard.

**Thermal properties:** Thermal stability of the polymer materials was evaluated by thermogravimetric analysis (TGA; TA Instrument) at a heating rate of 10  $^{\circ}\text{C min}^{-1}$ . Phase transition behavior of the polymer material were determined using a differential scanning calorimeter (DSC, SHIMADZU DSC-60 PLUS) at the rate of heating/cooling process of 5.0  $^{\circ}\text{C min}^{-1}$ . The liquid-crystalline phase of the polymer materials was observed by using polarizing optical microscope (POM, Olympus BX53) equipped with a cooling and heating stage (Linkam Scientific Instruments, 10002L). The microphotographs were taken with a DP27 (Olympus) camera, adapted to the microscope.

**Photophysical properties:** UV-vis absorption spectra were recorded on a JASCO V-500 absorption spectrometer. Samples for the absorption measurements were prepared by dissolving the pristine powder solid sample of **P-2** in a common organic solvent to a concentration of  $1.0 \times 10^{-5} \text{ mol L}^{-1}$ , and the solution was transferred into quartz cuvettes with an optical path length 1.0 cm. The steady-state PL spectra and quantum yields in solution, and pristine powder solid states were acquired using a JASCO FP-6600 fluorescence spectrometer and an absolute PL quantum yield measurement system (Hamamatsu Photonics, C11347-01). A solution-phase sample with a concentration of  $1.0 \times 10^{-6} \text{ mol L}^{-1}$  was used for PL measurements using quartz cuvettes (1.0 cm path length). The excitation wavelength ( $\lambda_{\text{ex}}$ ) corresponded to the maximum absorption wavelength. Pristine powder solid samples for PL measurements were prepared by re-precipitation from MeOH, and were used without further purification. The excitation or PL measurements were performed using powder sample placed between two quartz glass plates. The PL samples in N phase for photophysical measurements were prepared by quick freezing using liquid  $\text{N}_2$  bath after thermal phase transition at 150  $^{\circ}\text{C}$ . For the quantum yields, the N-phase samples were also put a quartz Petri dish, and characterized using a calibrated integrating sphere.

Synthetic pathway for the polymer materials **P-2-e** bearing pentafluorinated bistolane-based luminophore used in this study.

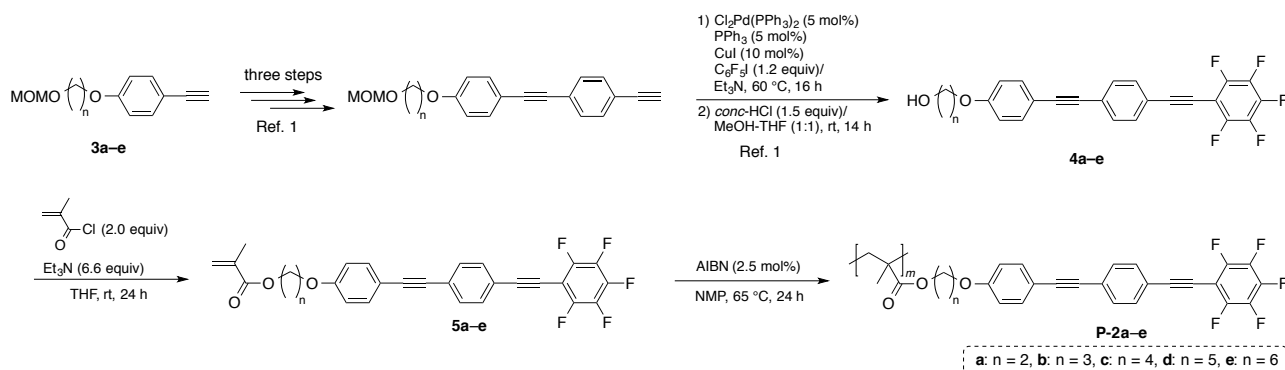

**Scheme S1.** Synthetic pathway for polymer materials **P-2a-e** bearing pentafluorinated bistolane-based luminophore.

## 1-2. Typical procedure for the preparation of 2,3,4,5,6-pentafluoro-1-[2-[4-(2-(4-(6-hydroxyhexyloxy)phenyl)ethyn-1-yl)phenyl]ethyn-1-yl]benzene (**4e**)

In a 100 mL two-necked round-bottomed flask was placed 1-ethynyl-4-[2-[4-(6-(methoxymethoxy)hexyloxy)phenyl]ethyn-1-yl]benzene (1.7 g, 4.7 mmol), prepared in three steps starting from 4-[6-(methoxymethoxy)hexyloxy]phenylacetylene (**3e**), iodopentafluorobenzene (2.1 g, 7.0 mmol)  $\text{Cl}_2\text{Pd}(\text{PPh}_3)_2$  (0.17 g, 0.24 mmol),  $\text{PPh}_3$  (0.062 g, 0.24 mmol),  $\text{CuI}$  (89 mg, 0.47 mmol), and  $\text{Et}_3\text{N}$  (40 mL). The whole was heated at 60 °C for 16 h. After this time, the resulting precipitate was separated by atmospheric filtration and the filtrate was poured into a saturated aqueous  $\text{NH}_4\text{Cl}$  solution. The crude product was then extracted with  $\text{AcOEt}$  (three times), and the combined organic layer was washed with brine, dried over anhydrous  $\text{Na}_2\text{SO}_4$ , filtered, and the solvent was removed using a rotary evaporator. The resulting residue was passed through silica gel using a mixed solvent system (hexane/ $\text{AcOEt}$  = 10:1), followed by removing the solvent, being obtained the corresponding MOM-protected precursor (1.9 g, 3.6 mmol), which was used for the subsequent deprotection reaction without further purification. The precursor (1.9 g, 3.6 mmol) dissolved in  $\text{MeOH}$  (54 mL) and  $\text{THF}$  (54 mL) was cooled by dipping iced water. Into the ice-coold solution was added dropwise concentrated  $\text{HCl}$  solution (12 N, 9.4 mL, 4.1 mmol) and the whole was continuously stirred at room temperature overnight (22 h). The resultant was poured into saturated aqueous  $\text{NH}_4\text{Cl}$  solution. The crude product was then extracted with  $\text{AcOEt}$  (three times), and the combined organic layer was washed with brine, dried over anhydrous  $\text{Na}_2\text{SO}_4$ , filtered, and the solvent was removed in vacuo. The resulting residue was purified by silica-gel column chromatography using a mixed solvent system (hexane/ $\text{AcOEt}$  = 3:1) to obtain the desired product **4e** in 68% (1.6 g, 3.2 mmol, white solid). Spectral data for **4b** and **4e** are already reported in Ref. [1].

**1-2-1. 2,3,4,5,6-pentafluoro-1-[2-[4-(2-(4-(2-hydroxyethoxy)phenyl)ethyn-1-yl)phenyl]ethyn-1-yl]benzene (4a)**

Yield: 89% (white solid); M.p.: 166–167 °C; <sup>1</sup>H NMR (400 MHz, CDCl<sub>3</sub>): δ 2.01 (t, *J* = 6.0 Hz, 1H), 3.95–4.03 (m, 2H), 4.12 (t, *J* = 4.0 Hz, 2H), 6.91 (d, *J* = 8.8 Hz, 2H), 7.48 (d, *J* = 8.8 Hz, 2H), 7.51 (ABq, *J* = 8.4 Hz, 2H), 7.55 (ABq, *J* = 8.4 Hz, 2H); <sup>13</sup>C NMR (100 MHz, CDCl<sub>3</sub>): δ 61.4, 69.3, 74.6 (q, *J* = 3.6 Hz), 87.8, 92.0, 101.2 (d, *J* = 2.9 Hz), 114.7, 115.4, 120.8, 125.0, 131.5, 131.8, 133.2, 159.0, four carbons on the C<sub>6</sub>F<sub>5</sub> moiety cannot be found due to the low solubility; <sup>19</sup>F NMR (376 MHz, CDCl<sub>3</sub>): δ –136.43 (dd, *J* = 21.8, 6.8 Hz, 2F), –152.92 (t, *J* = 20.3 Hz, 1F), –162.21 (ddd, *J* = 21.8, 20.3, 6.8 Hz, 2F); IR (KBr): ν 3350, 3068, 2937, 2869, 2205, 1597, 1498, 1242, 1058, 993, 834 cm<sup>–1</sup>; HRMS (FAB+): *m/z* [M]<sup>+</sup> calcd for C<sub>24</sub>H<sub>13</sub>F<sub>5</sub>O<sub>2</sub>: 428.0836; found: 428.0842.

**1-2-2. 2,3,4,5,6-pentafluoro-1-[2-[4-(2-(4-(4-hydroxybutoxy)phenyl)ethyn-1-yl)phenyl]ethyn-1-yl]benzene (4c)**

Yield: 81% (white solid); M.p.: 153–154 °C; <sup>1</sup>H NMR (400 MHz, CDCl<sub>3</sub>): δ 1.50–1.59 (m, 1H), 1.72–1.81 (m, 2H), 1.85–1.97 (m, 2H), 3.74 (t, *J* = 6.0 Hz, 2H), 4.04 (t, *J* = 6.4 Hz, 2H), 6.88 (d, *J* = 8.8 Hz, 2H), 7.47 (d, *J* = 8.8 Hz, 2H), 7.51 (ABq, *J* = 8.8 Hz, 2H), 7.55 (ABq, *J* = 8.8 Hz, 2H); <sup>13</sup>C NMR (100 MHz, CDCl<sub>3</sub>): δ 25.7, 29.4, 62.6, 67.8, 74.6 (q, *J* = 5.8 Hz), 87.6, 92.3, 101.2 (d, *J* = 2.1 Hz), 114.6, 114.8, 120.7, 125.1, 131.4, 131.8, 133.2, 159.3, four carbons on the C<sub>6</sub>F<sub>5</sub> moiety cannot be found due to the low solubility; <sup>19</sup>F NMR (376 MHz, CDCl<sub>3</sub>): δ –136.44 (dd, *J* = 21.8, 6.8 Hz, 2F), –152.96 (t, *J* = 20.3 Hz, 1F), –162.23 (ddd, *J* = 21.8, 20.3, 6.8 Hz, 2F); IR (KBr): ν 3418, 3359, 2946, 2862, 2206, 1597, 1525, 1496, 1241, 1177, 1059, 993, 837 cm<sup>–1</sup>; HRMS (FAB+): *m/z* [M]<sup>+</sup> calcd for C<sub>26</sub>H<sub>17</sub>F<sub>5</sub>O<sub>2</sub>: 456.1149; found: 456.1156.

**1-2-3. 2,3,4,5,6-pentafluoro-1-[2-[4-(2-(4-(5-hydroxypentyloxy)phenyl)ethyn-1-yl)phenyl]ethyn-1-yl]benzene (4d)**

Yield: 97% (white solid); M.p.: 149–150 °C; <sup>1</sup>H NMR (400 MHz, CDCl<sub>3</sub>): δ 1.2–1.4 (m, 1H), 1.52–1.61 (m, 2H), 1.62–1.71 (m, 2H), 1.84 (quint., *J* = 6.4 Hz, 2H), 3.70 (t, *J* = 6.4 Hz, 2H), 4.00 (t, *J* = 6.4 Hz, 2H), 6.88 (d, *J* = 8.8 Hz, 2H), 7.46 (d, *J* = 8.8 Hz, 2H), 7.51 (ABq, *J* = 8.8 Hz, 2H), 7.55 (ABq, *J* = 8.8 Hz, 2H); <sup>13</sup>C NMR (100 MHz, CDCl<sub>3</sub>): δ 22.3, 29.0, 32.4, 62.8, 68.0, 74.5 (q, *J* = 2.9 Hz), 87.5, 92.3, 100.2 (td, *J* = 17.6, 3.6 Hz), 101.2 (d, *J* = 3.7 Hz), 114.6, 114.7, 120.7, 125.1, 131.4, 131.8, 133.2, 136.2–139.0 (dm, *J* = 250.8), 140.0–143.0 (dm, *J* = 258.2 Hz), 145.6–148.5 (dm, *J* = 261.8 Hz), 159.4; <sup>19</sup>F NMR (100 MHz, CDCl<sub>3</sub>): δ –136.44 (dd, *J* = 20.7, 6.8 Hz, 2F), –152.97 (t, *J* = 20.7 Hz, 1F), –162.23 (ddd, *J* = 20.7, 20.7, 6.8 Hz, 2F); IR (KBr): ν 3438, 2937, 2859, 2205, 1597, 1525, 1496, 1284, 1242, 1177, 1058, 993, 961, 834 cm<sup>–1</sup>; HRMS (FAB+): *m/z* [M]<sup>+</sup> calcd for C<sub>27</sub>H<sub>19</sub>F<sub>5</sub>O<sub>2</sub>: 470.1305; found: 470.1303.

**1-3. Typical procedure for the preparation of 6-[4-[4-[(2,3,4,5,6-pentafluorophenyl)ethynyl]phenylethynyl]phenoxy]hexyl methacrylate (5e).**

In a two-necked round-bottomed flask, equipped with a reflux condenser, was placed **4e** (1.6 g, 3.2 mmol) in THF (60 mL). To the solution was added dropwise methacryloyl chloride (0.67 g, 6.4 mmol) and Et<sub>3</sub>N



(0.9 mL) at 0 °C, followed by stirring at room temperature. After stirring at that temperature for 24 h, precipitate was separated by atmospheric filtration, followed by evaporation of the solvent. The crude product was extracted with CH<sub>2</sub>Cl<sub>2</sub> (three times) and organic layer combined was washed with aqueous saturated NaHCO<sub>3</sub> solution (three times) and brine (once). Organic layer collected was dried over anhydrous Na<sub>2</sub>SO<sub>4</sub>, filtered, and evaporated in vacuo. The residue was purified by silica-gel column chromatography using hexane/CH<sub>2</sub>Cl<sub>2</sub> (2/1) as an eluent to obtain the title compound **5e** in 90% yield (1.6 g, 2.9 mmol) as a white solid.

**1-3-1. 2-[4-[4-[(2,3,4,5,6-pentafluorophenyl)ethynyl]phenylethynyl]phenoxy]ethyl methacrylate (5a)**

Yield: 96% (white solid); M.p.: 157–158 °C; <sup>1</sup>H NMR (400 MHz, CDCl<sub>3</sub>): δ 1.96 (s, 3H), 4.25 (dd, *J* = 5.2, 4.4 Hz, 2H), 4.51 (dd, *J* = 5.2, 4.4 Hz, 2H), 5.60 (quint., *J* = 1.6 Hz, 1H), 6.15 (brs, 1H), 6.91 (d, *J* = 8.8 Hz, 2H), 7.48 (d, *J* = 8.8 Hz, 2H), 7.51 (ABq, *J* = 8.4 Hz, 2H), 7.55 (ABq, *J* = 8.4 Hz, 2H); <sup>13</sup>C NMR (100 MHz, CDCl<sub>3</sub>): δ 18.2, 62.9, 66.0, 74.6 (d, *J* = 2.9 Hz), 87.8, 92.0, 100.2 (td, *J* = 17.5, 4.4 Hz), 101.2 (d, *J* = 3.7 Hz), 114.8, 115.4, 120.8, 125.0, 126.1, 131.4, 131.8, 133.2, 135.9, 136.4–139.0 (dm, *J* = 252.3 Hz), 140.0–142.8 (dm, *J* = 256.8 Hz), 145.6–148.4 (dm, *J* = 254.5 Hz), 158.9, 167.2; <sup>19</sup>F NMR (376 MHz, CDCl<sub>3</sub>): δ –136.43 (dd, *J* = 21.8, 6.8 Hz, 2F), –152.94 (t, *J* = 20.3 Hz, 1F), –162.22 (ddd, *J* = 21.8, 20.3, 6.8 Hz, 2F); IR (KBr): ν 3044, 2964, 2880, 2203, 1714, 1638 (C=C), 1596, 1454, 1252, 1171, 1066, 986, 834 cm<sup>–1</sup>; HRMS (FAB+): *m/z* [M]<sup>+</sup> calcd for C<sub>28</sub>H<sub>17</sub>F<sub>5</sub>O<sub>3</sub>: 496.1098; found: 496.1105.

**1-3-2. 3-[4-[4-[(2,3,4,5,6-pentafluorophenyl)ethynyl]phenylethynyl]phenoxy]propyl methacrylate (5b)**

Yield: 91% (white solid); M.p.: 147–148 °C; <sup>1</sup>H NMR (400 MHz, CDCl<sub>3</sub>): δ 1.95 (s, 3H), 2.19 (quint., *J* = 6.4 Hz, 2H), 4.10 (t, *J* = 6.4 Hz, 2H), 4.36 (t, *J* = 6.4 Hz, 2H), 5.58 (quint., *J* = 1.6 Hz, 1H), 6.11 (brs, 1H), 6.88 (d, *J* = 8.8 Hz, 2H), 7.47 (d, *J* = 8.8 Hz, 2H), 7.51 (ABq, *J* = 8.4 Hz, 2H), 7.55 (ABq, *J* = 8.4 Hz, 2H); <sup>13</sup>C NMR (100 MHz, CDCl<sub>3</sub>): δ 18.3, 28.6, 61.4, 64.5, 74.5 (d, *J* = 3.6 Hz), 87.6, 92.2, 100.2 (td, *J* = 18.3, 3.7 Hz), 101.2 (d, *J* = 2.9 Hz), 114.5, 115.0, 120.7, 125.0, 125.5, 131.4, 131.8, 133.2, 136.3, 136.4–139.2 (dm, *J* = 255.2 Hz), 140.1–142.8 (dm, *J* = 257.5 Hz), 145.6–148.4 (dm, *J* = 249.4 Hz), 159.1, 167.3; <sup>19</sup>F NMR (376 MHz, CDCl<sub>3</sub>): δ –136.44 (dd, *J* = 21.8, 6.8 Hz, 2F), –152.95 (t, *J* = 20.3 Hz, 1F), –162.23 (ddd, *J* = 21.8, 20.3, 6.8 Hz, 2F); IR (KBr): ν 2977, 2900, 2206, 1709, 1633 (C=C), 1596, 1506, 1469, 1321, 1247, 1167, 1038, 982, 833 cm<sup>–1</sup>; HRMS (FAB+): *m/z* [M]<sup>+</sup> calcd for C<sub>29</sub>H<sub>19</sub>F<sub>5</sub>O<sub>3</sub>: 510.1254; found: 510.1254.

**1-3-3. 4-[4-[4-[(2,3,4,5,6-pentafluorophenyl)ethynyl]phenylethynyl]phenoxy]butyl methacrylate (5c)**

Yield: 99% (white solid); M.p.: 126–127 °C; <sup>1</sup>H NMR (400 MHz, CDCl<sub>3</sub>): δ 1.88–1.93 (m, 4H), 1.95 (dd, *J* = 1.2, 0.8 Hz, 3H), 4.03 (t, *J* = 5.6 Hz, 2H), 4.24 (t, *J* = 6.0 Hz, 2H), 5.56 (quint., *J* = 1.6 Hz, 1H), 6.10–6.12 (m, 1H), 6.88 (d, *J* = 8.8 Hz, 2H), 7.47 (d, *J* = 8.8 Hz, 2H), 7.51 (ABq, *J* = 8.4 Hz, 2H), 7.55 (ABq, *J* = 8.4 Hz, 2H); <sup>13</sup>C NMR (100 MHz, CDCl<sub>3</sub>): δ 18.3, 25.4, 25.9, 64.2, 67.4, 74.5 (d, *J* = 2.9 Hz), 87.6, 92.2,

100.2 (td,  $J = 17.6, 3.7$  Hz), 101.2 (d,  $J = 2.9$  Hz), 114.5, 114.8, 120.7, 125.0, 125.3, 131.4, 131.8, 133.2, 136.4, 136.0–139.2 (m), 140.0–142.9 (dm  $J = 250.9$  Hz), 145.5–148.4 (dm,  $J = 252.3$  Hz), 159.3, 167.4;  $^{19}\text{F}$  NMR (376 MHz,  $\text{CDCl}_3$ ):  $\delta$  –136.44 (dd,  $J = 20.7, 6.8$  Hz, 2F), –152.96 (t,  $J = 20.3$  Hz, 1F), –162.23 (ddd,  $J = 20.7, 20.3, 6.8$  Hz, 2F); IR (KBr):  $\nu$  1959, 2894, 2206, 1712, 1637 (C=C), 1597, 1503, 1451, 1288, 1184, 1047, 968, 838  $\text{cm}^{-1}$ ; HRMS (FAB+):  $m/z$   $[\text{M}]^+$  calcd for  $\text{C}_{30}\text{H}_{21}\text{F}_5\text{O}_3$ : 524.1411; found: 524.1404.

**1-3-4. 5-[4-[4-[(2,3,4,5,6-pentafluorophenyl)ethynyl]phenylethynyl]phenoxy]pentyl methacrylate (5d)**

Yield: 92% (white solid); M.p.: 113–114 °C;  $^1\text{H}$  NMR (400 MHz,  $\text{CDCl}_3$ ):  $\delta$  1.53–1.64 (m, 2H), 1.77 (quint.,  $J = 6.8$  Hz, 2H), 1.85 (quint.,  $J = 7.2$  Hz, 2H), 1.95 (t,  $J = 0.8$  Hz, 3H), 3.99 (t,  $J = 6.0$  Hz, 2H), 4.19 (t,  $J = 6.8$  Hz, 2H), 5.56 (quint.,  $J = 1.6$  Hz, 1H), 6.09–6.12 (m, 1H), 6.87 (d,  $J = 8.8$  Hz, 2H), 7.46 (d,  $J = 8.8$  Hz, 2H), 7.51 (ABq,  $J = 8.4$  Hz, 2H), 7.55 (ABq,  $J = 8.4$  Hz, 2H);  $^{13}\text{C}$  NMR (100 MHz,  $\text{CDCl}_3$ ):  $\delta$  18.3, 22.6, 28.4, 28.8, 64.4, 67.7, 74.5 (d,  $J = 2.9$  Hz), 87.5, 92.3, 100.2 (td,  $J = 18.3, 2.9$  Hz), 101.2 (d,  $J = 3.0$  Hz), 114.5, 114.7, 120.7, 125.1, 125.2, 131.4, 131.7, 133.1, 136.4, 136.0–139.1 (m), 140.0–142.9 (dm,  $J = 256.8$  Hz), 145.5–148.6 (dm,  $J = 254.4$  Hz), 159.4, 167.4;  $^{19}\text{F}$  NMR (376 MHz,  $\text{CDCl}_3$ ):  $\delta$  –136.44 (dd,  $J = 21.8, 6.8$  Hz, 2F), –152.97 (t,  $J = 20.3$  Hz, 1F), –162.23 (ddd,  $J = 21.8, 20.3, 6.8$  Hz, 2F); IR (KBr):  $\nu$  3041, 2942, 2867, 2206, 1709, 1633 (C=C), 1597, 1525, 1498, 1247, 1172, 989, 959, 830  $\text{cm}^{-1}$ ; HRMS (FAB+):  $m/z$   $[\text{M}]^+$  calcd for  $\text{C}_{31}\text{H}_{23}\text{F}_5\text{O}_3$ : 538.1567; found: 538.1561.

**1-3-5. 6-[4-[4-[(2,3,4,5,6-pentafluorophenyl)ethynyl]phenylethynyl]phenoxy]hexyl methacrylate (5e)**

Yield: 90% (white solid); M.p.: 108–109 °C;  $^1\text{H}$  NMR (400 MHz,  $\text{CDCl}_3$ ):  $\delta$  1.42–1.60 (m, 4H), 1.72 (quint.,  $J = 6.8$  Hz, 2H), 1.82 (quint.,  $J = 6.4$  Hz, 2H), 1.95 (dd,  $J = 1.2, 1.2$  Hz, 3H), 3.98 (t,  $J = 6.4$  Hz, 2H), 4.16 (t,  $J = 6.4$  Hz, 2H), 5.55 (quint.,  $J = 2.0$  Hz, 1H), 6.09–6.11 (m, 1H), 6.87 (d,  $J = 8.8$  Hz, 2H), 7.46 (d,  $J = 8.8$  Hz, 2H), 7.51 (ABq,  $J = 8.4$  Hz, 2H), 7.54 (ABq,  $J = 8.4$  Hz, 2H);  $^{13}\text{C}$  NMR (100 MHz,  $\text{CDCl}_3$ ):  $\delta$  18.3, 25.7, 25.8, 28.5, 29.1, 64.4, 67.8, 74.5 (d,  $J = 3.6$  Hz), 87.5, 92.3, 100.2 (td,  $J = 16.9, 3.7$  Hz), 101.2 (d,  $J = 2.9$  Hz), 114.5, 114.7, 120.7, 125.1, 125.2, 131.4, 131.8, 133.1, 136.5, 136.3–138.9 (dm,  $J = 241.4$  Hz), 140.0–142.8 (dm,  $J = 251.6$  Hz), 147.5–148.5 (dm,  $J = 253.8$  Hz), 159.4, 167.5;  $^{19}\text{F}$  NMR (376 MHz,  $\text{CDCl}_3$ ):  $\delta$  –136.45 (dd,  $J = 20.3, 6.8$  Hz, 2F), –152.98 (t,  $J = 20.3$  Hz, 1F), –162.24 (ddd,  $J = 20.3, 20.3, 6.8$  Hz, 2F); IR (KBr):  $\nu$  3034, 2949, 2897, 2208, 1704, 1634 (C=C), 1598, 1492, 1255, 1172, 1107, 1014, 965, 847  $\text{cm}^{-1}$ ; HRMS (FAB+):  $m/z$   $[\text{M}]^+$  calcd for  $\text{C}_{32}\text{H}_{25}\text{F}_5\text{O}_3$ : 552.1724; found: 552.1729.

**1-4. Typical procedure for the preparation of Poly[6-[4-[4-[(2,3,4,5,6-pentafluorophenyl)ethynyl]phenylethynyl]phenoxy]hexyl methacrylate] (P-2e) (Condition A).**

In a two-necked round-bottomed flask was added freshly prepared monomer **5e** (0.28 g, 0.5 mmol) and NMP (5.0 mL). To the solution was added  $N,N'$ -azobis(isobutyronitrile) (AIBN, 2 mg, 0.012 mmol) in one portion. The whole was degassed with a freeze-pump-thaw technique, followed by raising temperature to 65 °C (bath temp.). After vigorous stirring at that temperature for 24 h, followed by addition of excess

amount of MeOH, the precipitate formed was separated by vacuum filtration. The filter-cake obtained was washed with MeOH twice and the title polymer **P-2e** was finally obtained in 75% conversion (0.21 g) as a white solid.

**1-4-1. Poly[2-[4-[4-[(2,3,4,5,6-pentafluorophenyl)ethynyl]phenylethynyl]phenoxy]ethyl methacrylate] (P-2a)**

Conversion: 48% (Brown solid);  $M_n = 4820$ ;  $M_w = 7230$ ;  $M_w/M_n = 1.50$ ;  $T_g$ : 85 °C;  $^1\text{H}$  NMR (400 MHz,  $\text{CDCl}_3$ ):  $\delta$  0.8–1.5 (m, 3H), 1.8–2.5 (m, 2H), 3.8–4.6 (m, 4H), 6.6–7.0 (m, 2H), 7.2–7.6 (m, 6H);  $^{19}\text{F}$  NMR (376 MHz,  $\text{CDCl}_3$ ):  $\delta$  –136.3 to –136.9 (m, 2F), –152.8 to –153.1 (m, 1F), –162.0 to –162.7 (m, 2F); IR (KBr):  $\nu$  3043, 2938, 2212, 1730, 1590, 1525, 1505, 1244, 1178, 1056, 989, 834  $\text{cm}^{-1}$ .

**1-4-2. Poly[3-[4-[4-[(2,3,4,5,6-pentafluorophenyl)ethynyl]phenylethynyl]phenoxy]propyl methacrylate] (P-2b)**

Conversion: 81% (White solid);  $M_n = 8330$ ;  $M_w = 1320$ ;  $M_w/M_n = 1.59$ ;  $T_g$ : 79 °C;  $^1\text{H}$  NMR (400 MHz,  $\text{CDCl}_3$ ):  $\delta$  0.7–1.2 (m, 3H), 1.7–2.2 (m, 4H), 3.8–4.4 (m, 4H), 6.6–6.9 (m, 2H), 7.2–7.6 (m, 6H);  $^{19}\text{F}$  NMR (376 MHz,  $\text{CDCl}_3$ ):  $\delta$  –136.3 to –136.8 (m, 2F), –152.5 to –153.1 (m, 1F), –162.0 to –162.5 (m, 2F); IR (KBr):  $\nu$  3043, 2955, 2897, 2212, 1730, 1598, 1525, 1499, 1248, 1174, 1049, 909, 837  $\text{cm}^{-1}$ .

**1-4-3. Poly[4-[4-[4-[(2,3,4,5,6-pentafluorophenyl)ethynyl]phenylethynyl]phenoxy]butyl methacrylate] (P-2c)**

Conversion: 70% (White solid);  $M_n = 9490$ ;  $M_w = 16400$ ;  $M_w/M_n = 1.73$ ;  $T_g$ : 73 °C;  $^1\text{H}$  NMR (400 MHz,  $\text{CDCl}_3$ ):  $\delta$  0.8–1.2 (m, 3H), 1.6–2.1 (m, 6H), 3.8–4.2 (m, 4H), 6.6–6.9 (m, 2H), 7.3–7.6 (m, 6H);  $^{19}\text{F}$  NMR (376 MHz,  $\text{CDCl}_3$ ):  $\delta$  –136.3 to –136.9 (m, 2F), –152.8 to –153.1 (m, 1F), –162.0 to –162.6 (m, 2F); IR (KBr):  $\nu$  3039, 2952, 2873, 2212, 1727, 1598, 1525, 1498, 1248, 1174, 1140, 991, 833  $\text{cm}^{-1}$ .

**1-4-4. Poly[5-[4-[4-[(2,3,4,5,6-pentafluorophenyl)ethynyl]phenylethynyl]phenoxy]pentyl methacrylate] (P-2d)**

Conversion: 89% (Brown solid);  $M_n = 9570$ ;  $M_w = 16900$ ;  $M_w/M_n = 1.77$ ;  $T_g$ : 62 °C;  $^1\text{H}$  NMR (400 MHz,  $\text{CDCl}_3$ ):  $\delta$  0.8–1.2 (m, 3H), 1.6–2.2 (m, 8H), 3.8–4.2 (m, 4H), 6.6–6.9 (m, 2H), 7.3–7.6 (m, 6H);  $^{19}\text{F}$  NMR (376 MHz,  $\text{CDCl}_3$ ):  $\delta$  –136.3 to –136.8 (m, 2F), –152.7 to –153.1 (m, 1F), –162.1 to –162.5 (m, 2F); IR (KBr):  $\nu$  3042, 2947, 2869, 2211, 1728, 1598, 1525, 1498, 1248, 1110, 989, 965, 834  $\text{cm}^{-1}$ .

**1-4-5. Poly[6-[4-[4-[(2,3,4,5,6-pentafluorophenyl)ethynyl]phenylethynyl]phenoxy]hexyl methacrylate] (P-2e)**

Conversion: 75% (Yellow solid);  $M_n = 12500$ ;  $M_w = 18900$ ;  $M_w/M_n = 1.53$ ;  $T_g$ : 47 °C;  $^1\text{H}$  NMR (400 MHz,  $\text{CDCl}_3$ ):  $\delta$  0.8–1.2 (m, 3H), 1.3–2.2 (m, 10H), 3.7–4.1 (m, 4H), 6.7–6.9 (m, 2H), 7.3–7.6 (m, 6H);  $^{19}\text{F}$  NMR (376 MHz,  $\text{CDCl}_3$ ):  $\delta$  –136.4 to –136.8 (m, 2F), –152.8 to –153.1 (m, 1F), –162.1 to –162.5 (m, 2F); IR (KBr):  $\nu$  2939, 2865, 2211, 1727, 1598, 1525, 1499, 1247, 1174, 1140, 989, 965, 831  $\text{cm}^{-1}$ .

**1-5. Typical procedure for the preparation of Poly[6-[4-[4-[(2,3,4,5,6-pentafluorophenyl)ethynyl]phenylethynyl]phenoxy]hexyl methacrylate] (P<sub>B</sub>-2e) (Condition B).**

In a two-necked round-bottomed flask was added freshly prepared monomer **5e** (0.11 g, 0.2 mmol) and NMP (3.6 mL). To the solution was added AIBN (0.8 mg, 4.8  $\mu$ mol) in one portion. The whole was degassed with a freeze-pump-thaw technique, followed by raising temperature to 50 °C (bath temp.). After vigorous stirring at that temperature for 24 h, followed by addition of excess amount of MeOH, the precipitate formed was separated by vacuum filtration. The filter-cake obtained was washed with MeOH twice and the title polymer **P-2e** was finally obtained in 77% conversion (0.083 g) as a white solid.

**1-6. Typical procedure for the preparation of Poly[6-[4-[4-[(2,3,4,5,6-pentafluorophenyl)ethynyl]phenylethynyl]phenoxy]hexyl methacrylate] (P<sub>C</sub>-2e) (Condition C).**

In a two-necked round-bottomed flask was added freshly prepared monomer **5e** (0.17 g, 0.3 mmol) and NMP (5.0 mL). To the solution was added benzoyl peroxide (BPO, 18 mg, 0.075 mmol) in one portion. The whole was degassed with a freeze-pump-thaw technique, followed by raising temperature to 78 °C (bath temp.). After vigorous stirring at that temperature for 24 h, followed by addition of excess amount of MeOH, the precipitate formed was separated by vacuum filtration. The filter-cake obtained was washed with MeOH twice and the title polymer **P-2e** was finally obtained in 80% conversion (0.13 g) as a white solid.

**1-7. Typical procedure for the preparation of Poly[6-[4-[4-[(2,3,4,5,6-pentafluorophenyl)ethynyl]phenylethynyl]phenoxy]hexyl methacrylate] (P<sub>D</sub>-2e) (Condition D).**

In a two-necked round-bottomed flask, equipped with a reflux condenser, was added freshly prepared monomer **5e** (0.83 g, 1.5 mmol) and NMP (20 mL). To the solution was added AIBN (12 mg, 0.075 mmol) in one portion. The whole was degassed with a freeze-pump-thaw technique, followed by raising temperature to 60 °C (bath temp.). After vigorous stirring at that temperature for 24 h, followed by addition of excess amount of MeOH, the precipitate formed was separated by vacuum filtration. The filter-cake obtained was washed with MeOH twice and the title polymer **P-2e** was finally obtained in 82% conversion (0.68 g) as a white solid.

## 2. NMR spectra

$^1\text{H}$  NMR spectrum for **4a** (400 MHz,  $\text{CDCl}_3$ )

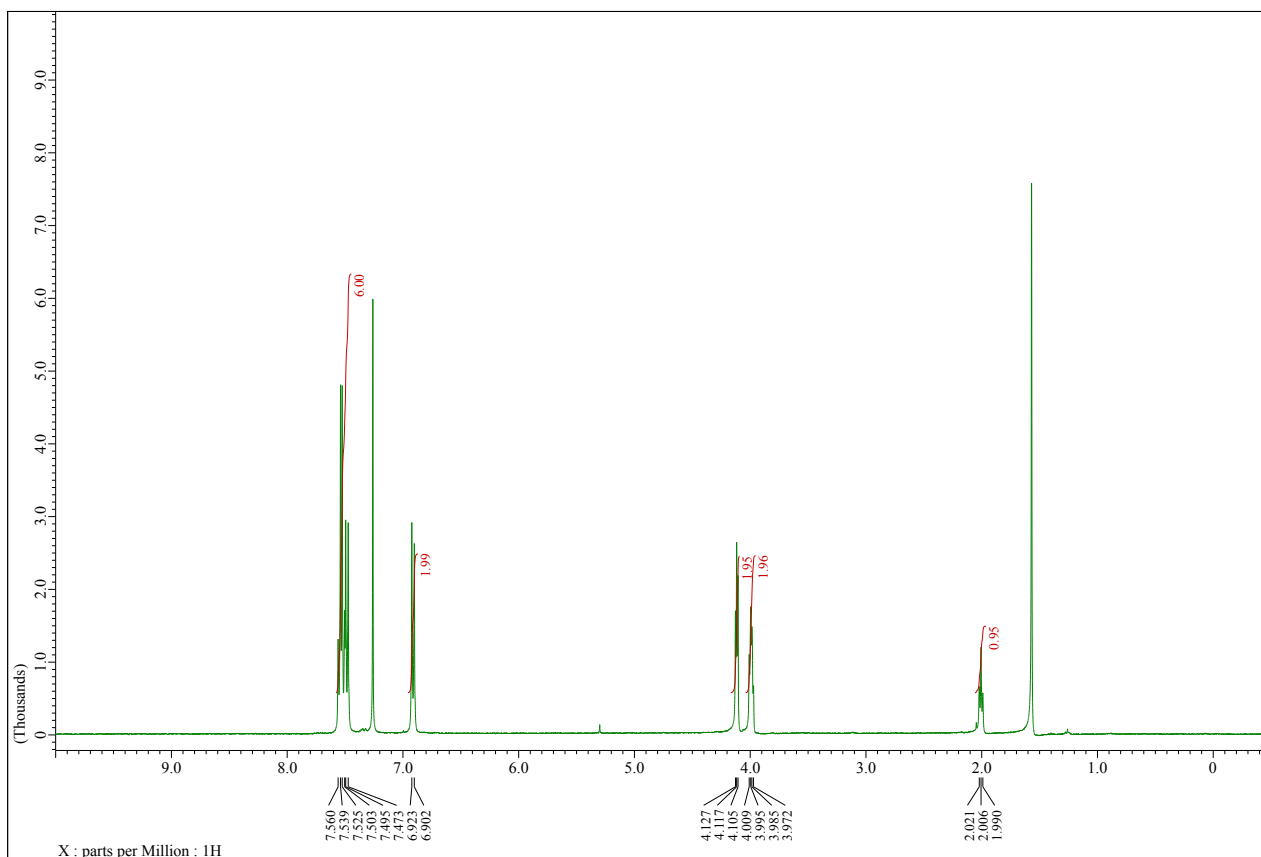

$^{13}\text{C}$  NMR spectrum for **4a** (100 MHz,  $\text{CDCl}_3$ )

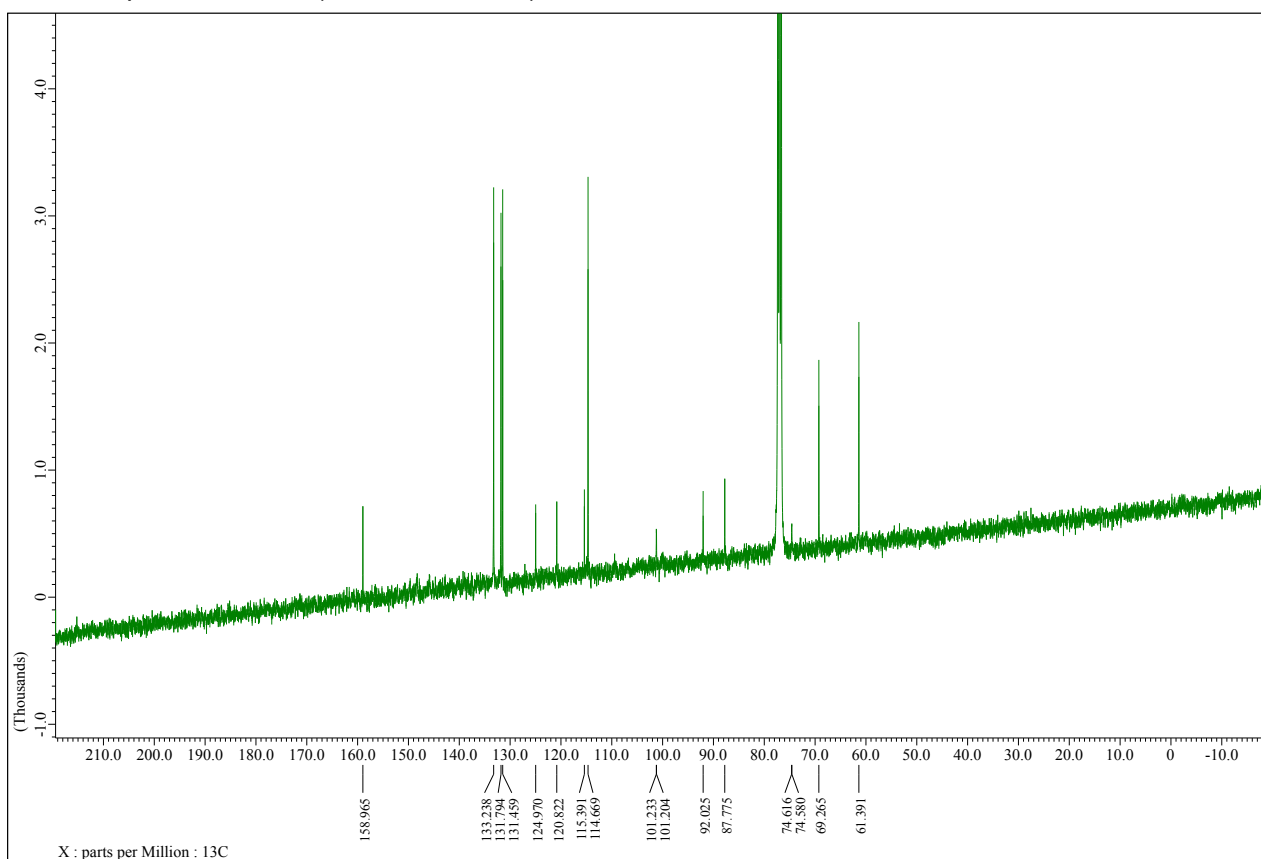

$^{19}\text{F}$  NMR spectrum for **4a** (376 MHz,  $\text{CDCl}_3$ )

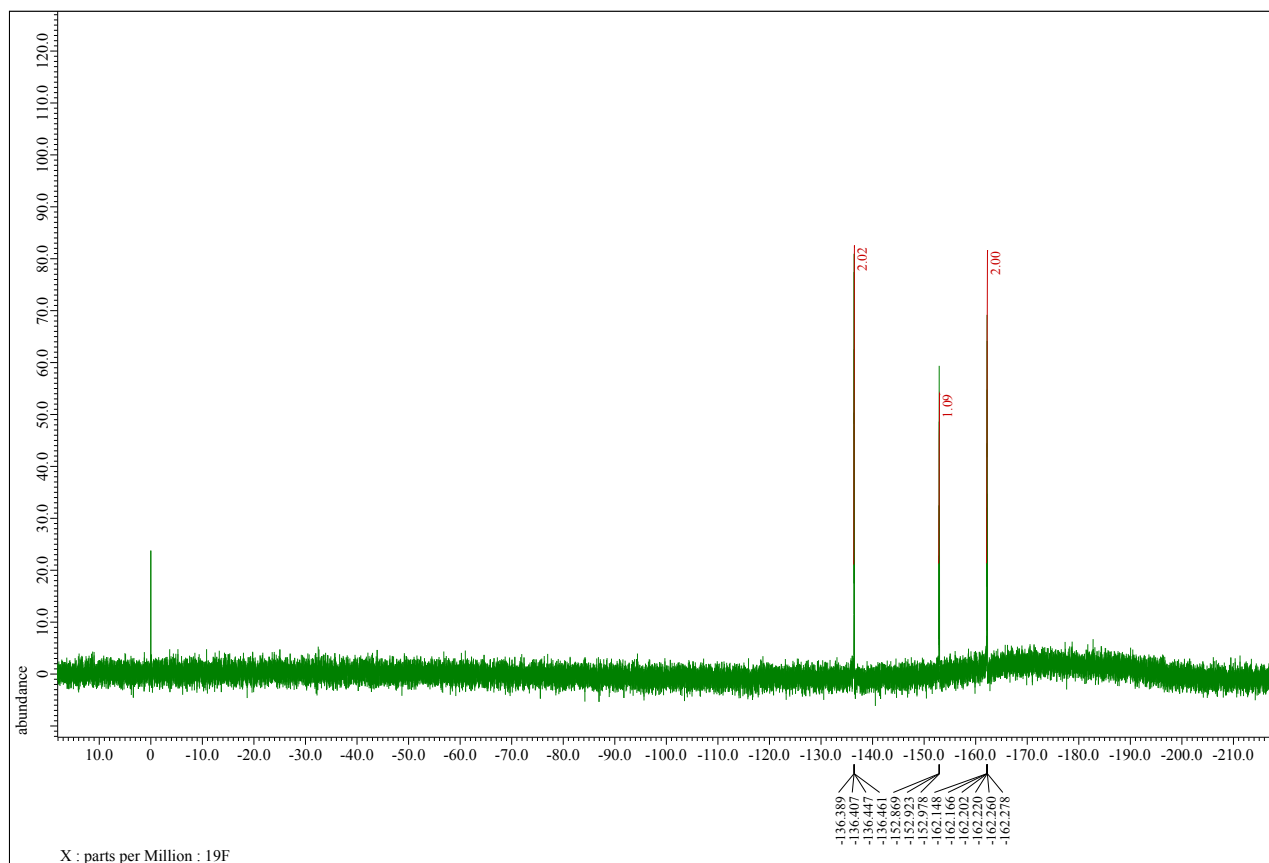

$^1\text{H}$  NMR spectrum for **4c** (400 MHz,  $\text{CDCl}_3$ )

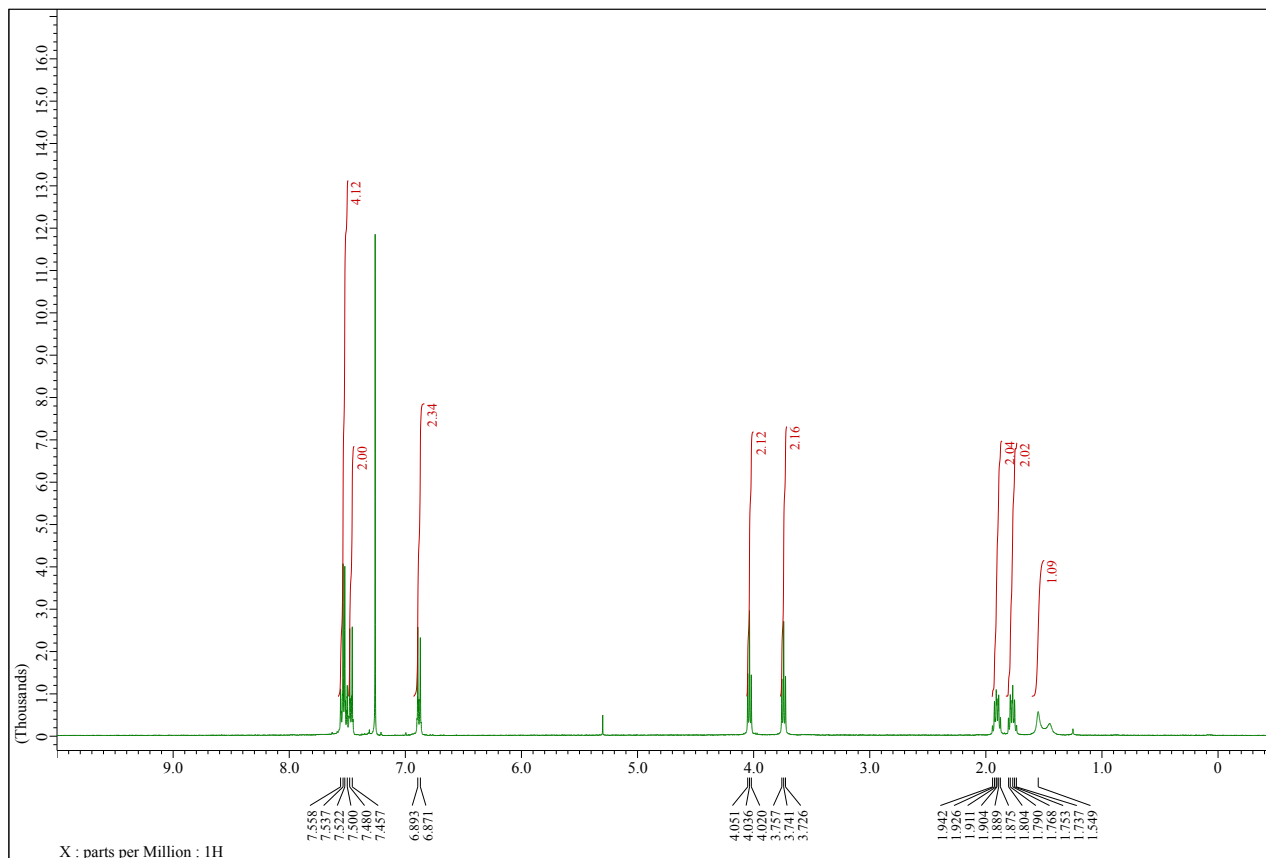

$^{13}\text{C}$  NMR spectrum for **4c** (100 MHz,  $\text{CDCl}_3$ )

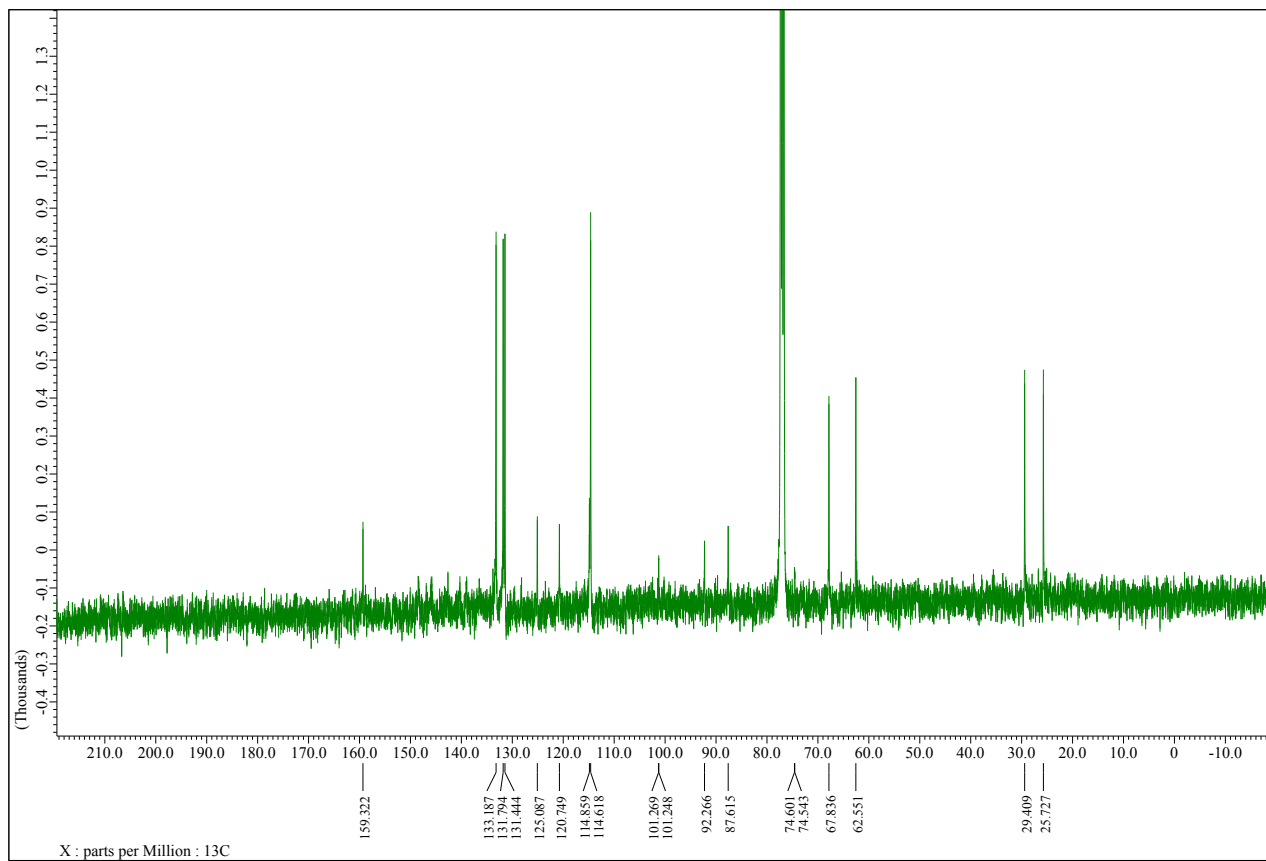

$^{19}\text{F}$  NMR spectrum for **4c** (376 MHz,  $\text{CDCl}_3$ )

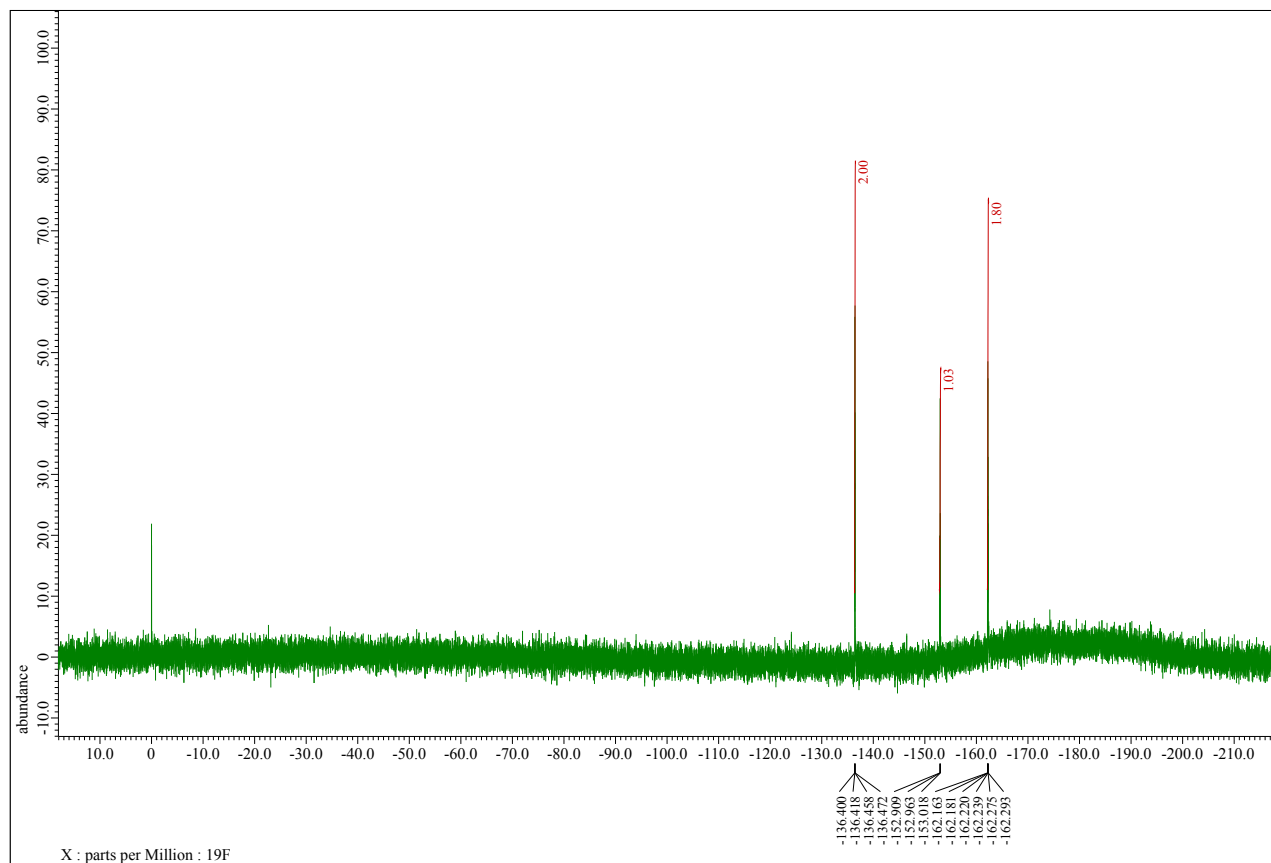



$^1\text{H}$  NMR spectrum for **4d** (400 MHz,  $\text{CDCl}_3$ )

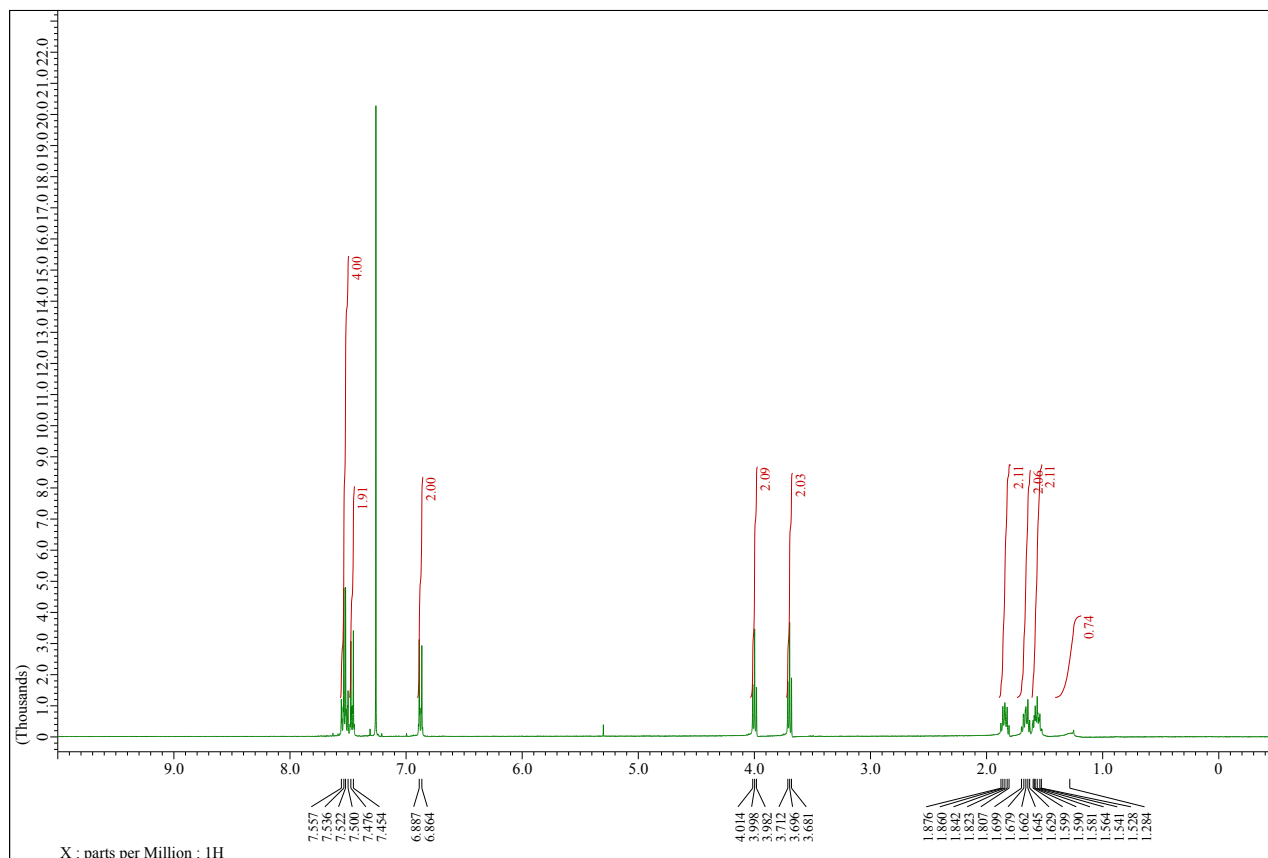

$^{13}\text{C}$  NMR spectrum for **4d** (100 MHz,  $\text{CDCl}_3$ )

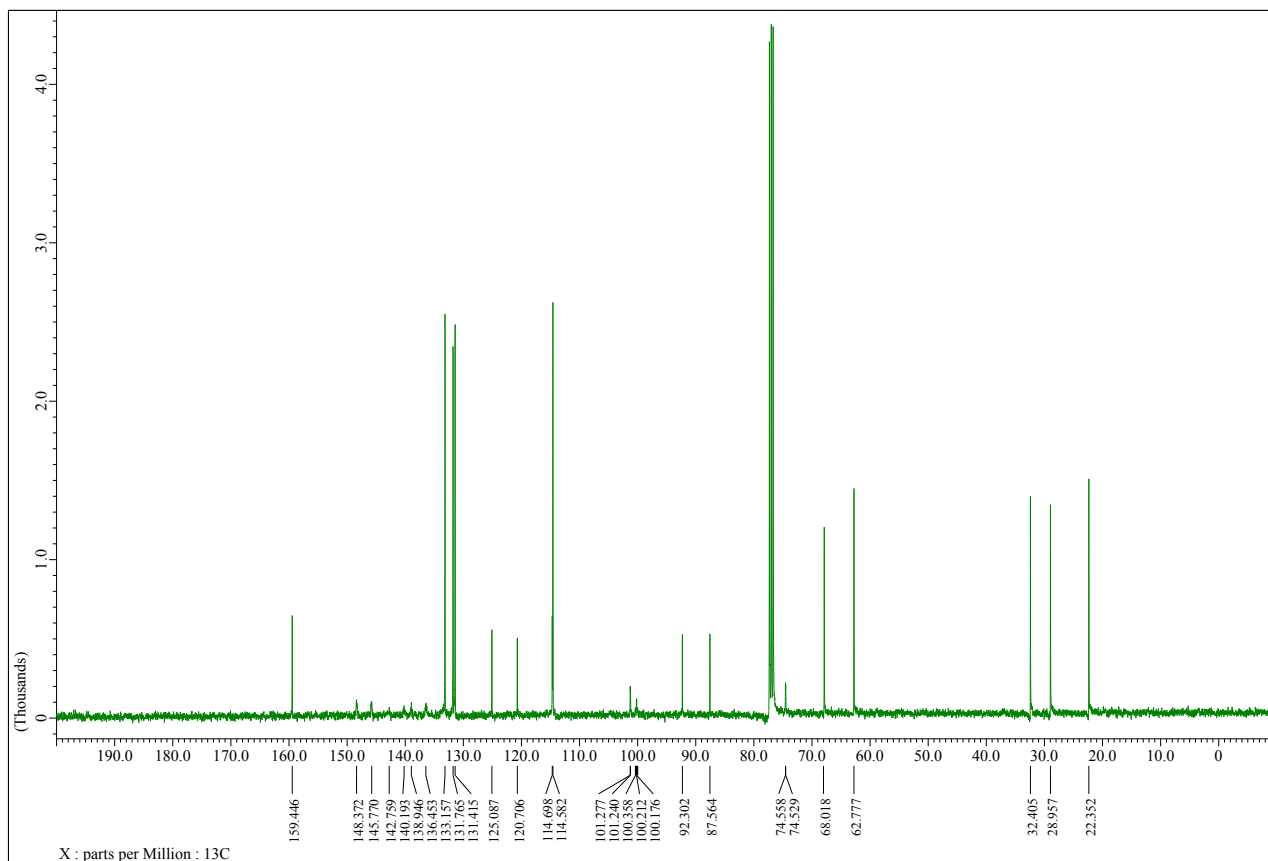

$^{19}\text{F}$  NMR spectrum for **4d** (376 MHz,  $\text{CDCl}_3$ )

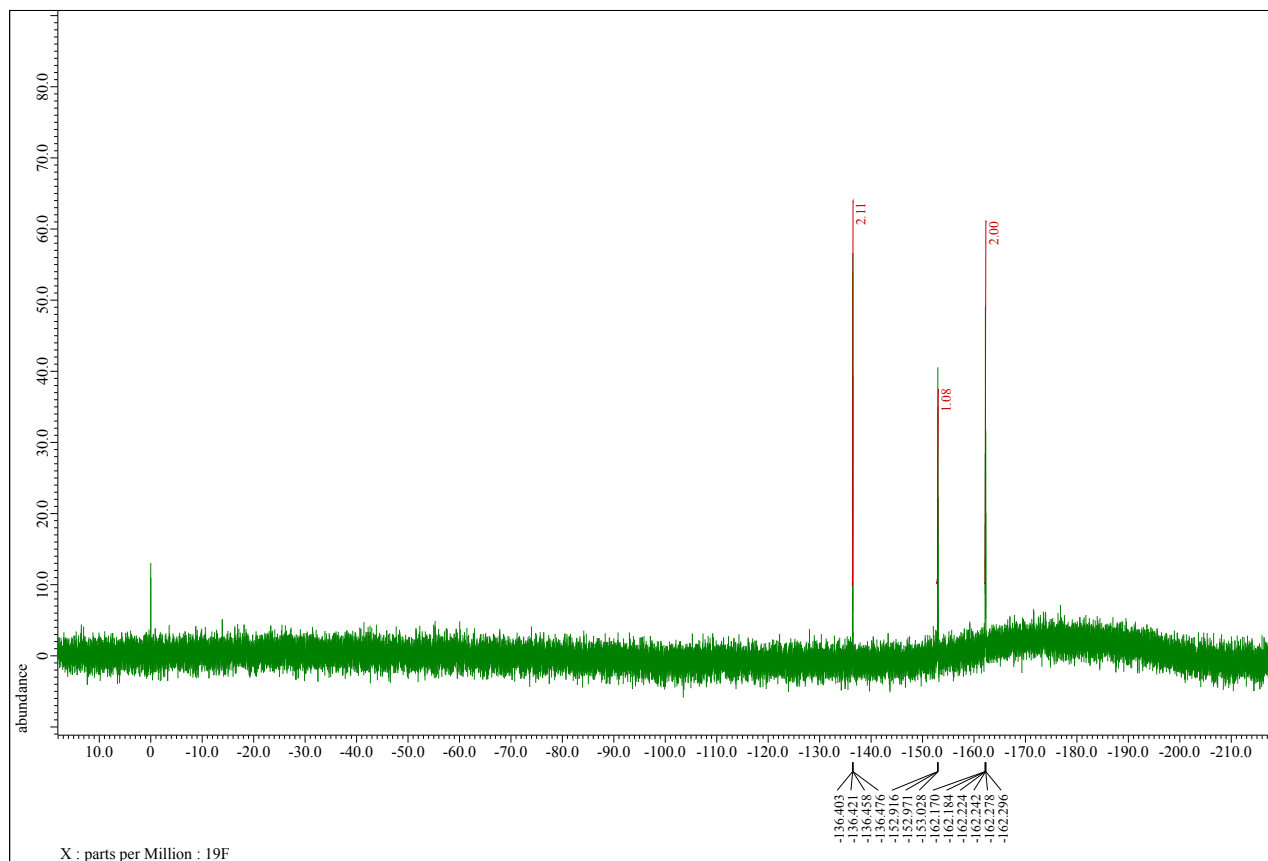

$^1\text{H}$  NMR spectrum for **5a** (400 MHz,  $\text{CDCl}_3$ )

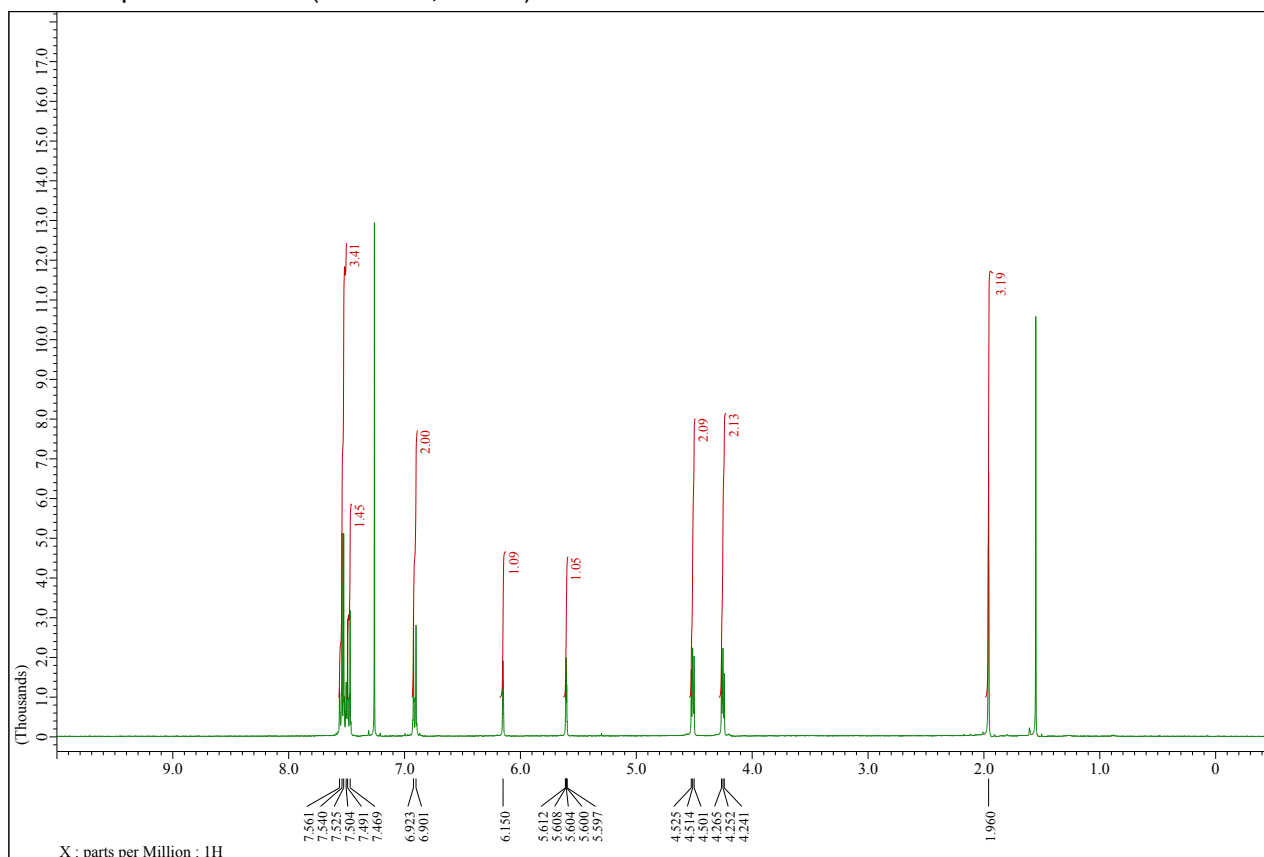

$^{13}\text{C}$  NMR spectrum for **5a** (100 MHz,  $\text{CDCl}_3$ )

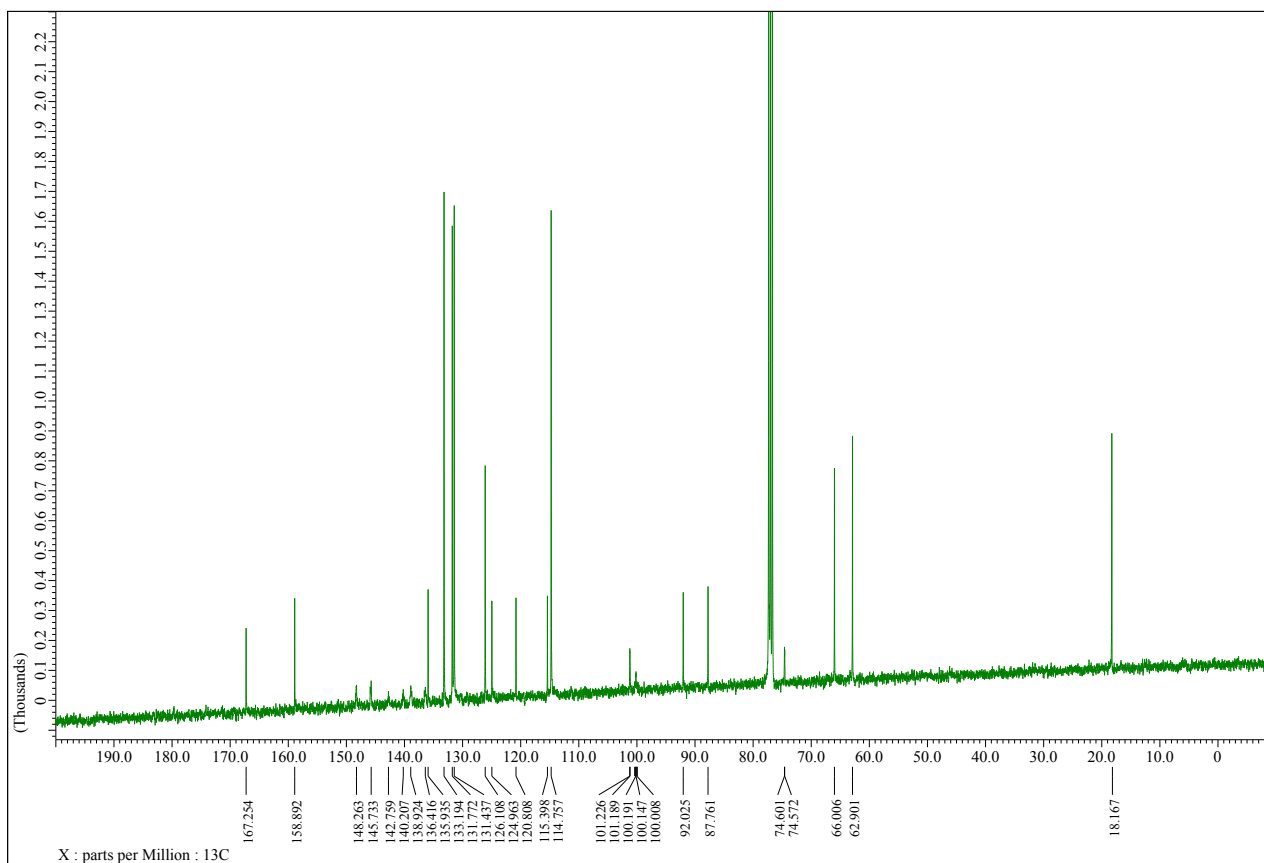

$^{19}\text{F}$  NMR spectrum for **5a** (376 MHz,  $\text{CDCl}_3$ )

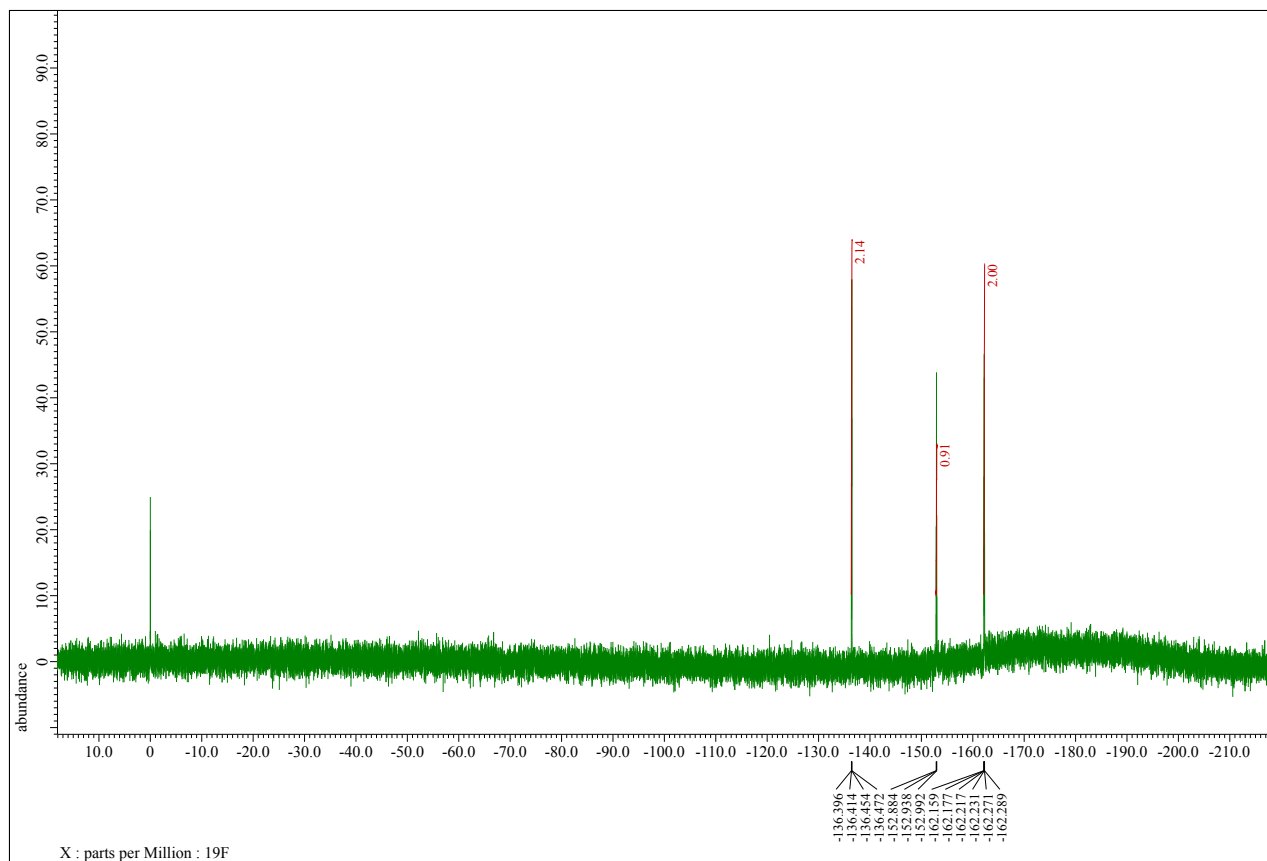

$^1\text{H}$  NMR spectrum for **5b** (400 MHz,  $\text{CDCl}_3$ )

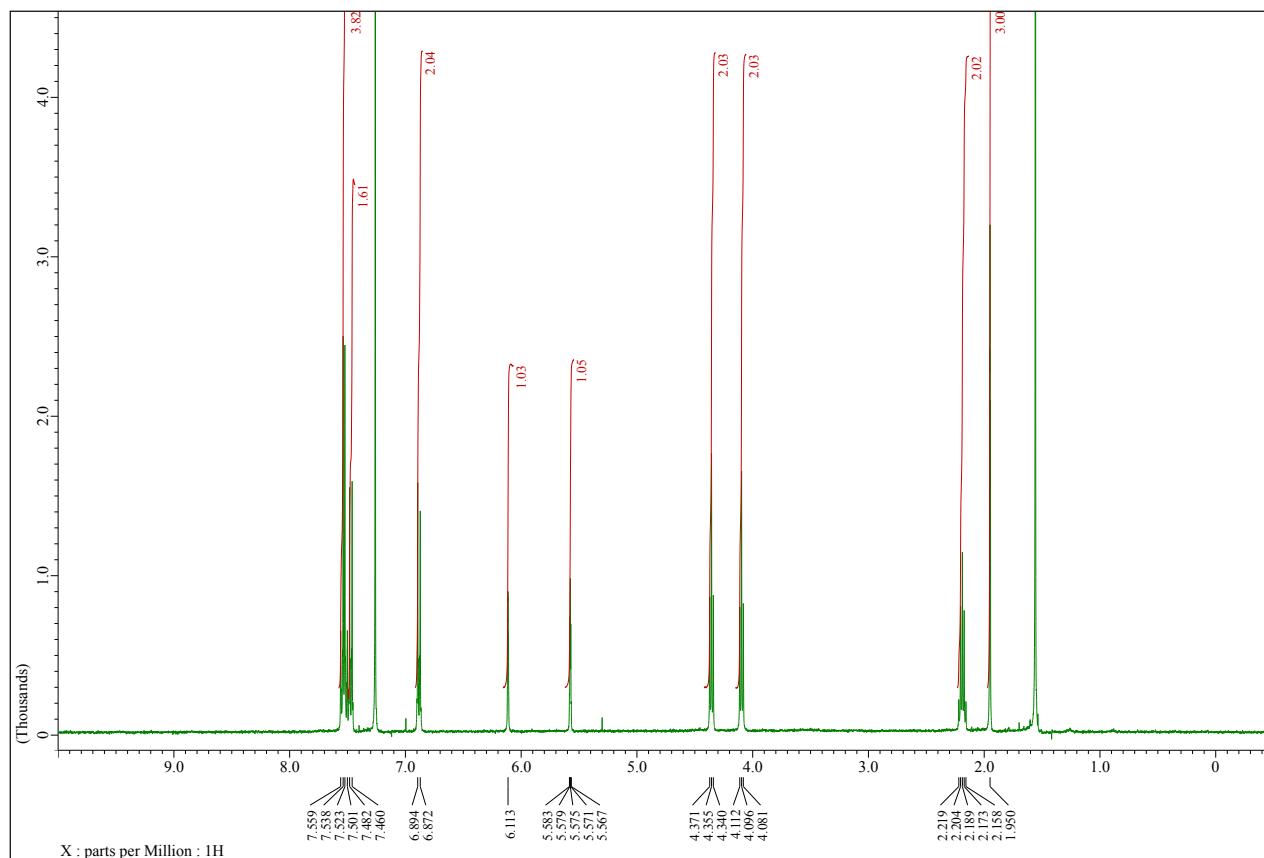

$^{13}\text{C}$  NMR spectrum for **5b** (100 MHz,  $\text{CDCl}_3$ )

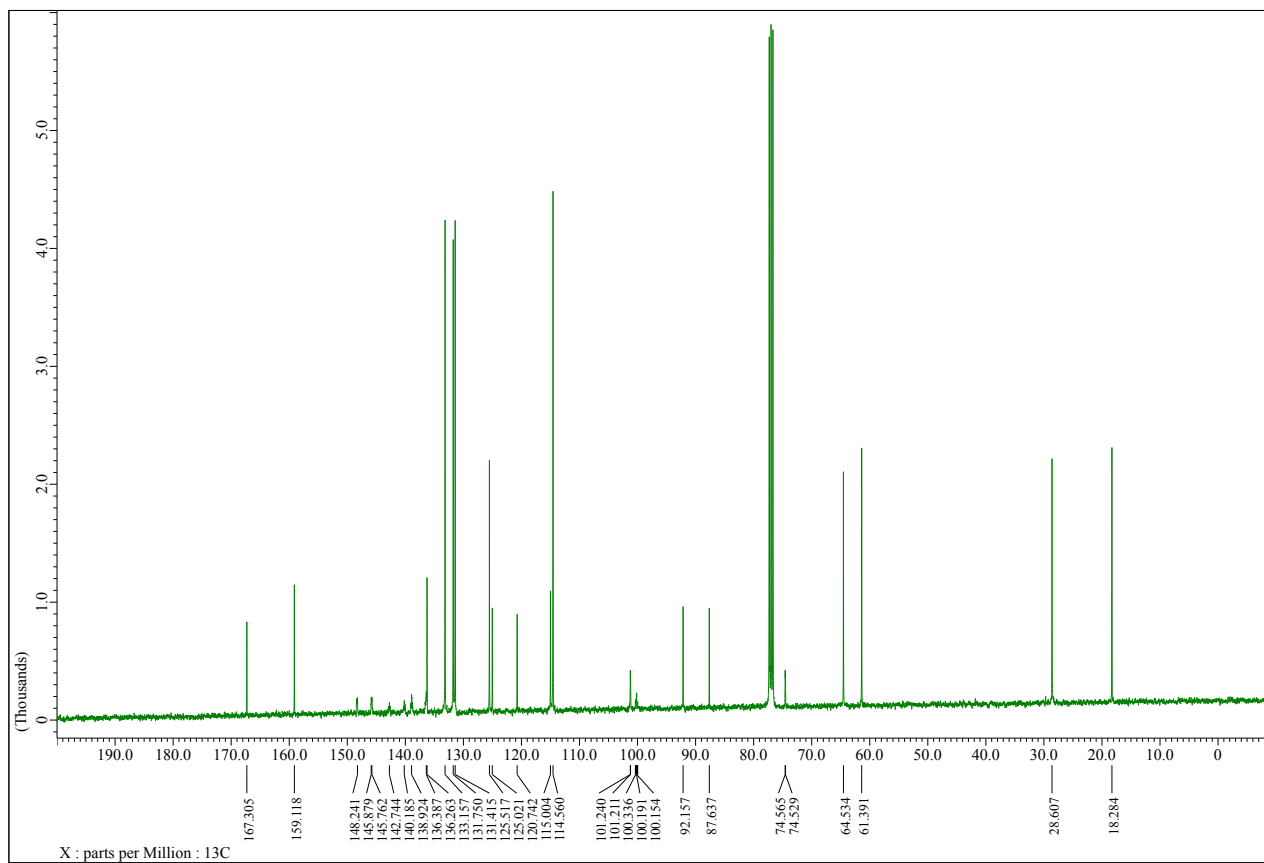

$^{19}\text{F}$  NMR spectrum for **5b** (376 MHz,  $\text{CDCl}_3$ )

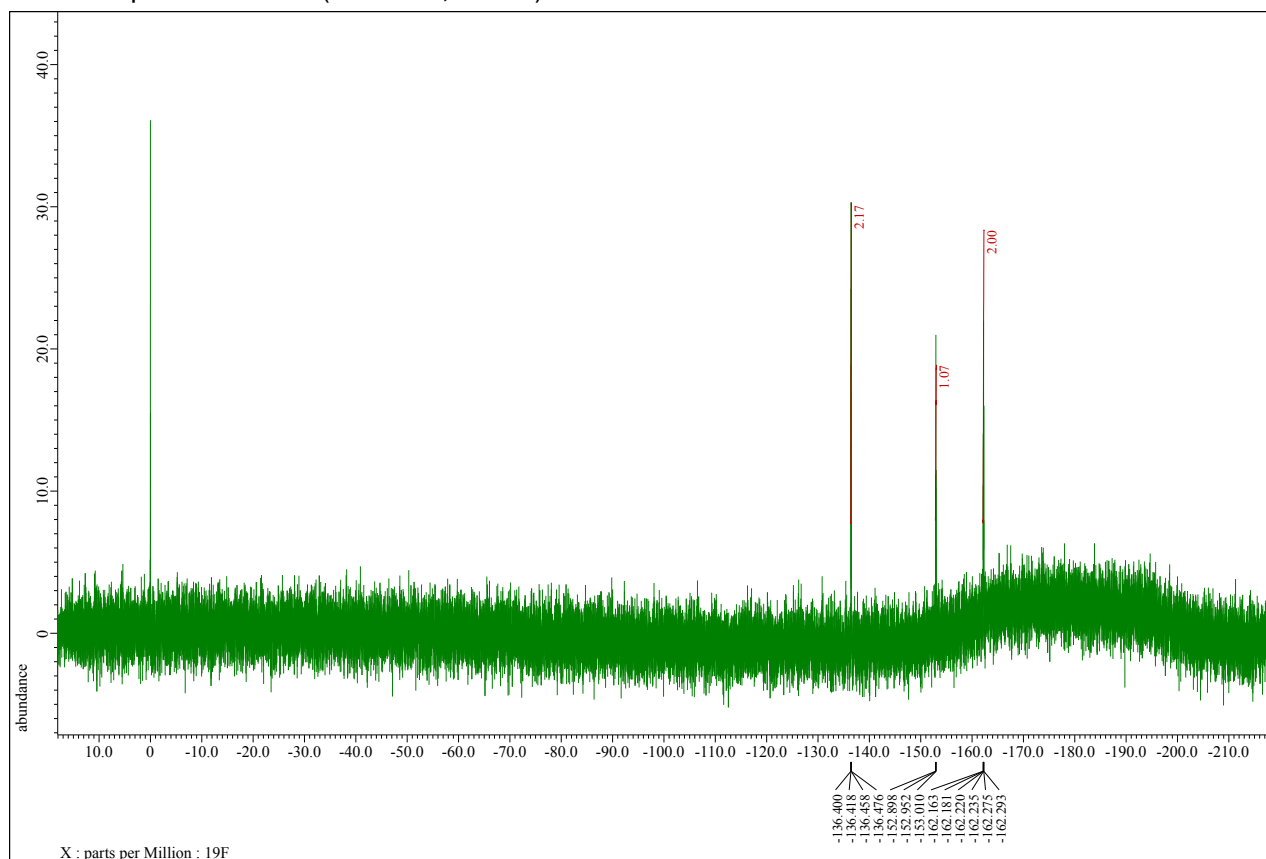

$^1\text{H}$  NMR spectrum for **5c** (400 MHz,  $\text{CDCl}_3$ )

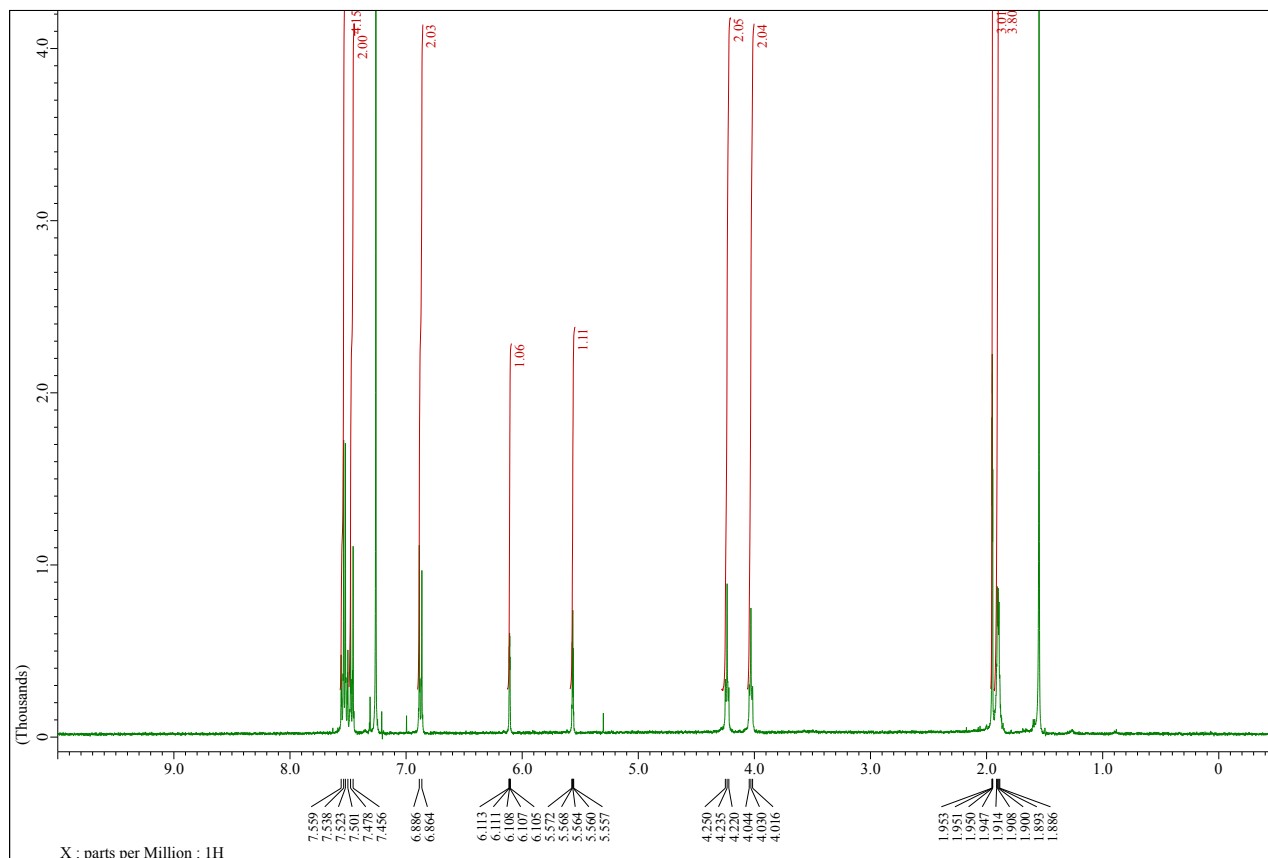

$^{13}\text{C}$  NMR spectrum for **5c** (100 MHz,  $\text{CDCl}_3$ )

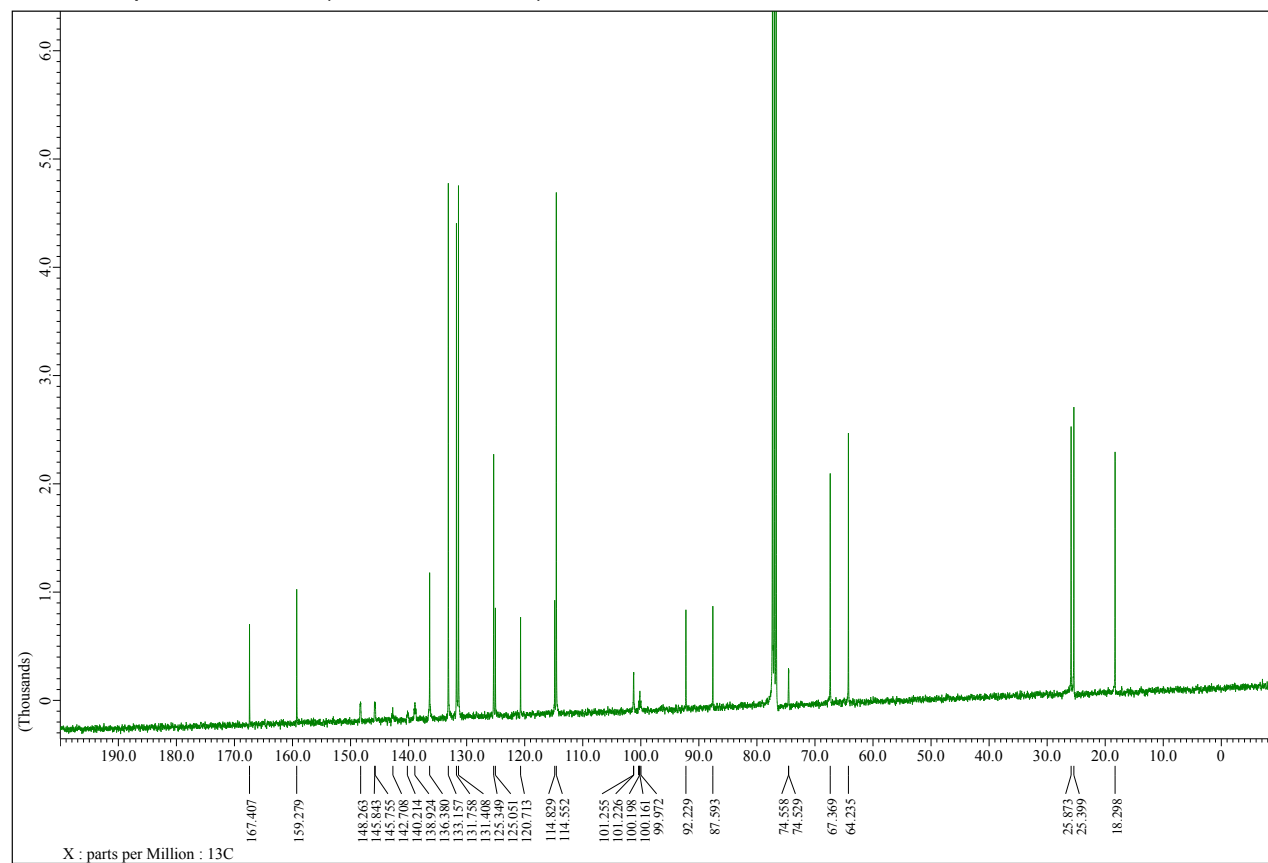

$^{19}\text{F}$  NMR spectrum for **5c** (376 MHz,  $\text{CDCl}_3$ )

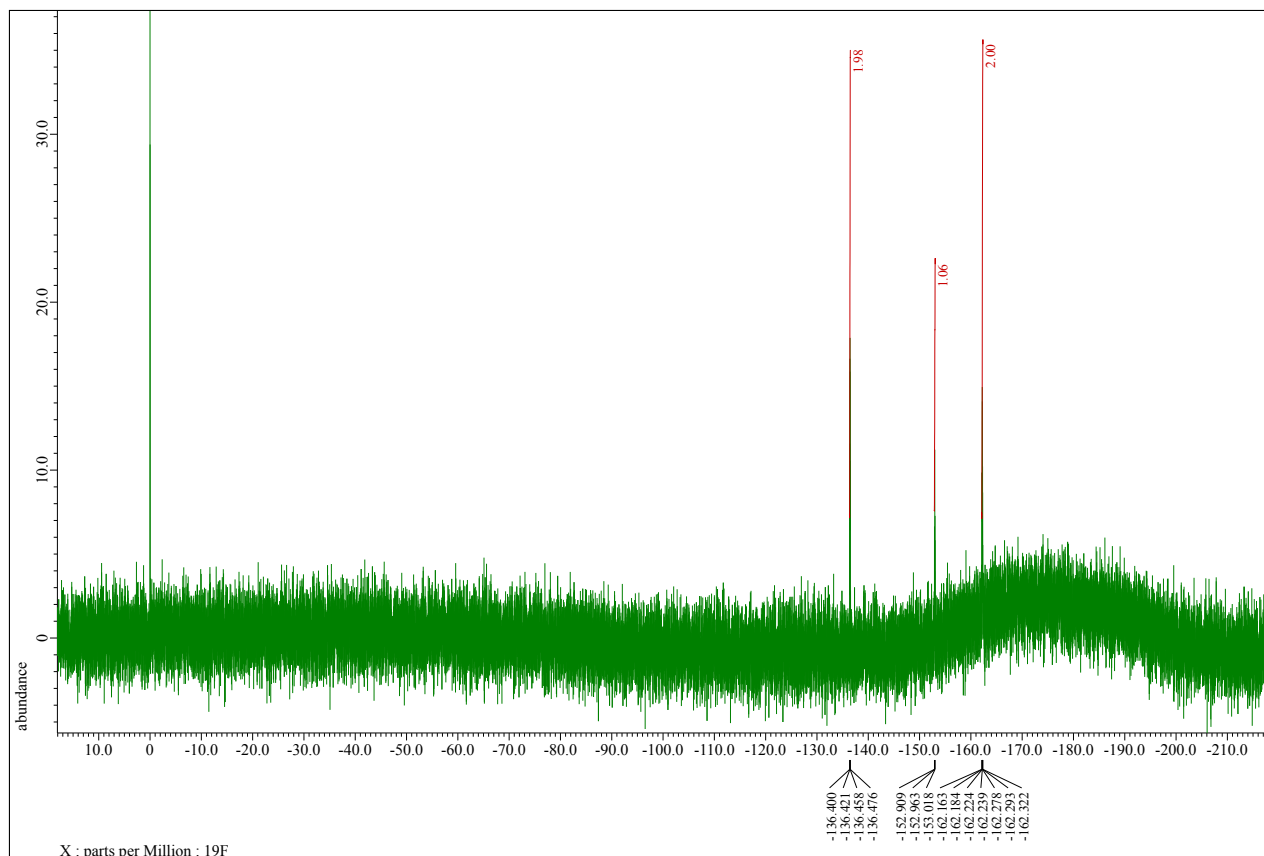



$^1\text{H}$  NMR spectrum for **5d** (400 MHz,  $\text{CDCl}_3$ )

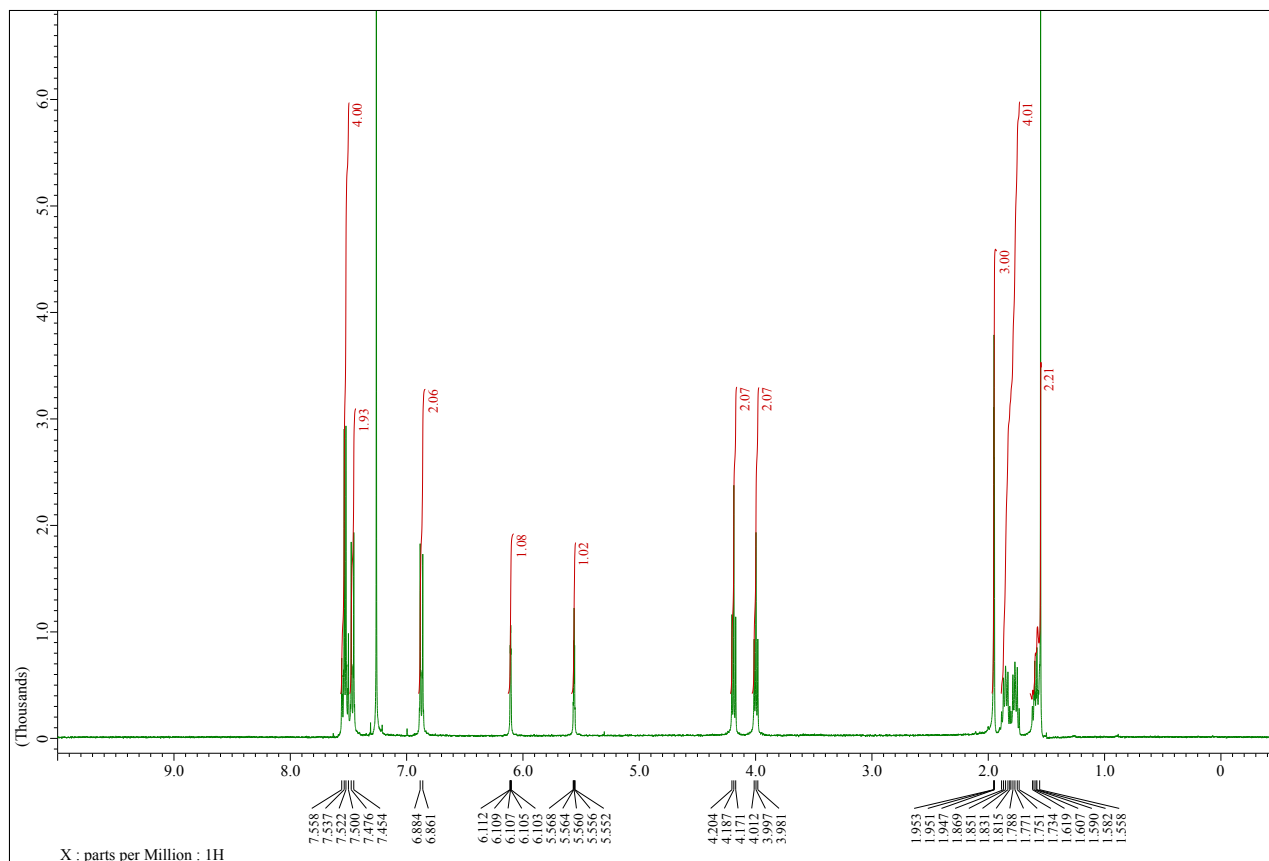

$^{13}\text{C}$  NMR spectrum for **5d** (100 MHz,  $\text{CDCl}_3$ )

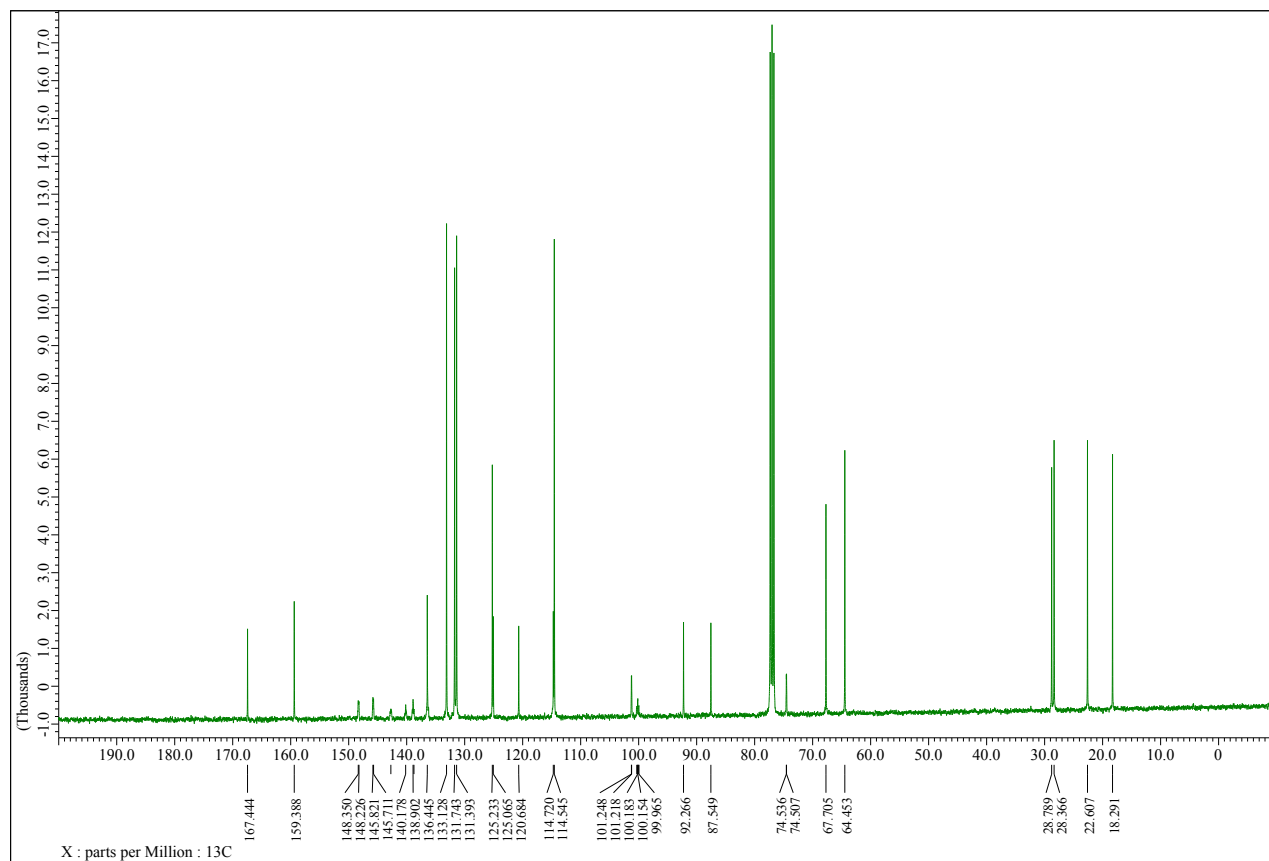

$^{19}\text{F}$  NMR spectrum for **5d** (376 MHz,  $\text{CDCl}_3$ )

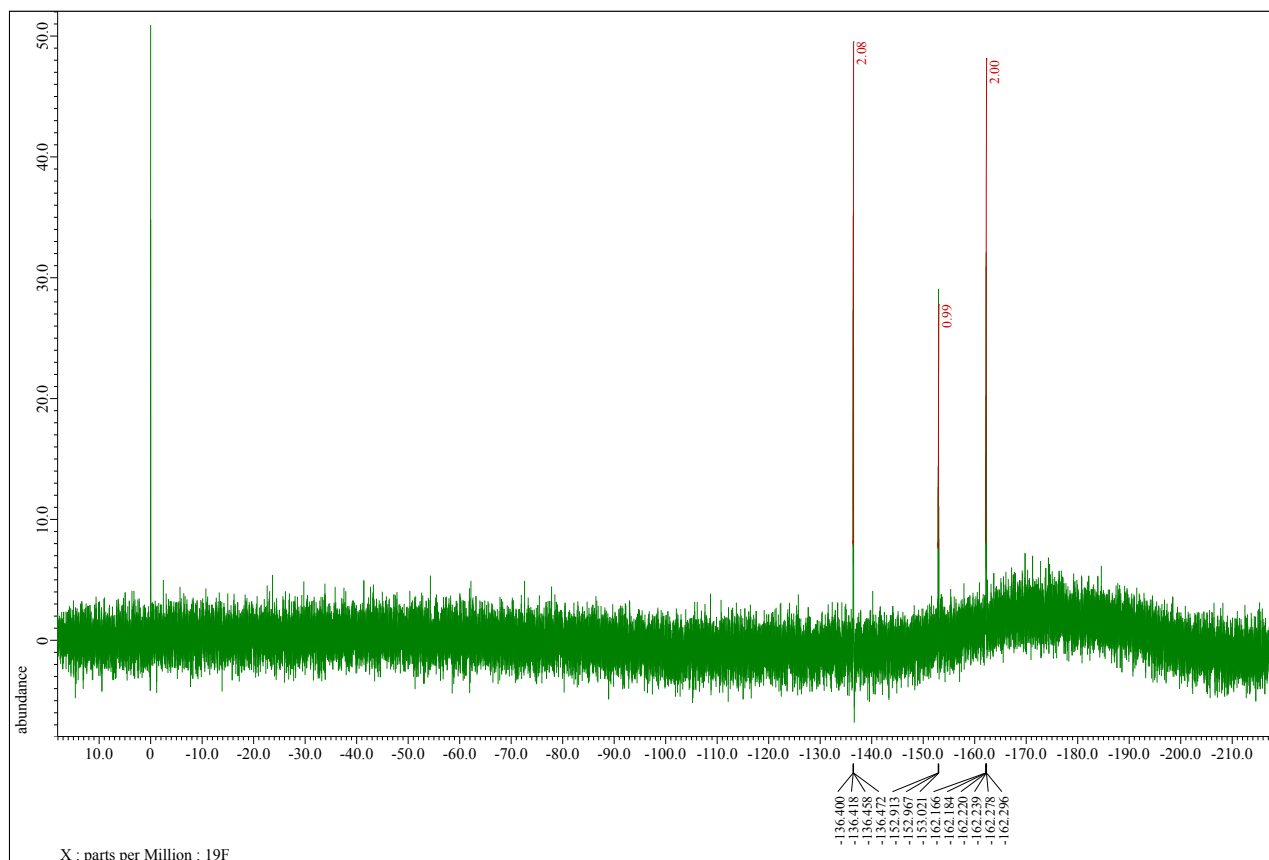

$^1\text{H}$  NMR spectrum for **5e** (400 MHz,  $\text{CDCl}_3$ )

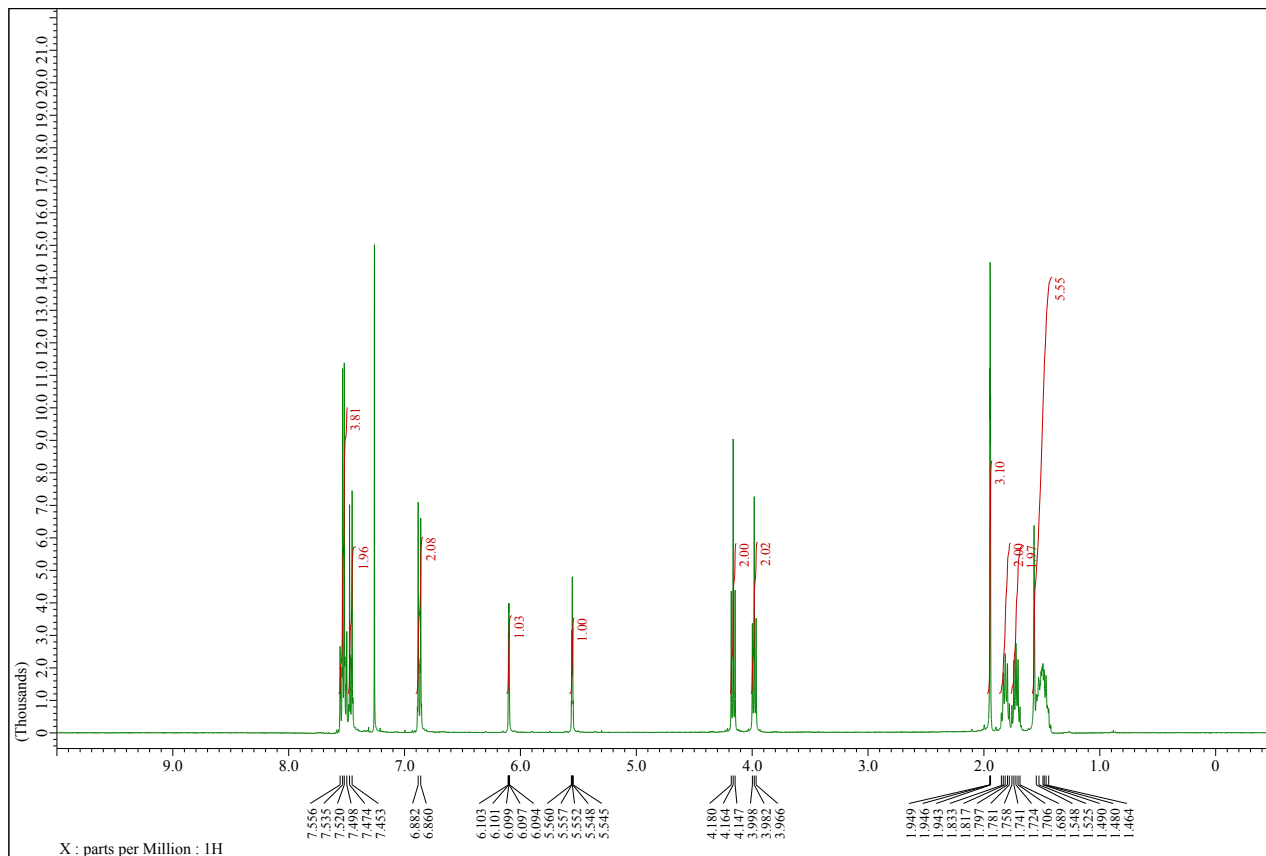

$^{13}\text{C}$  NMR spectrum for **5e** (100 MHz,  $\text{CDCl}_3$ )

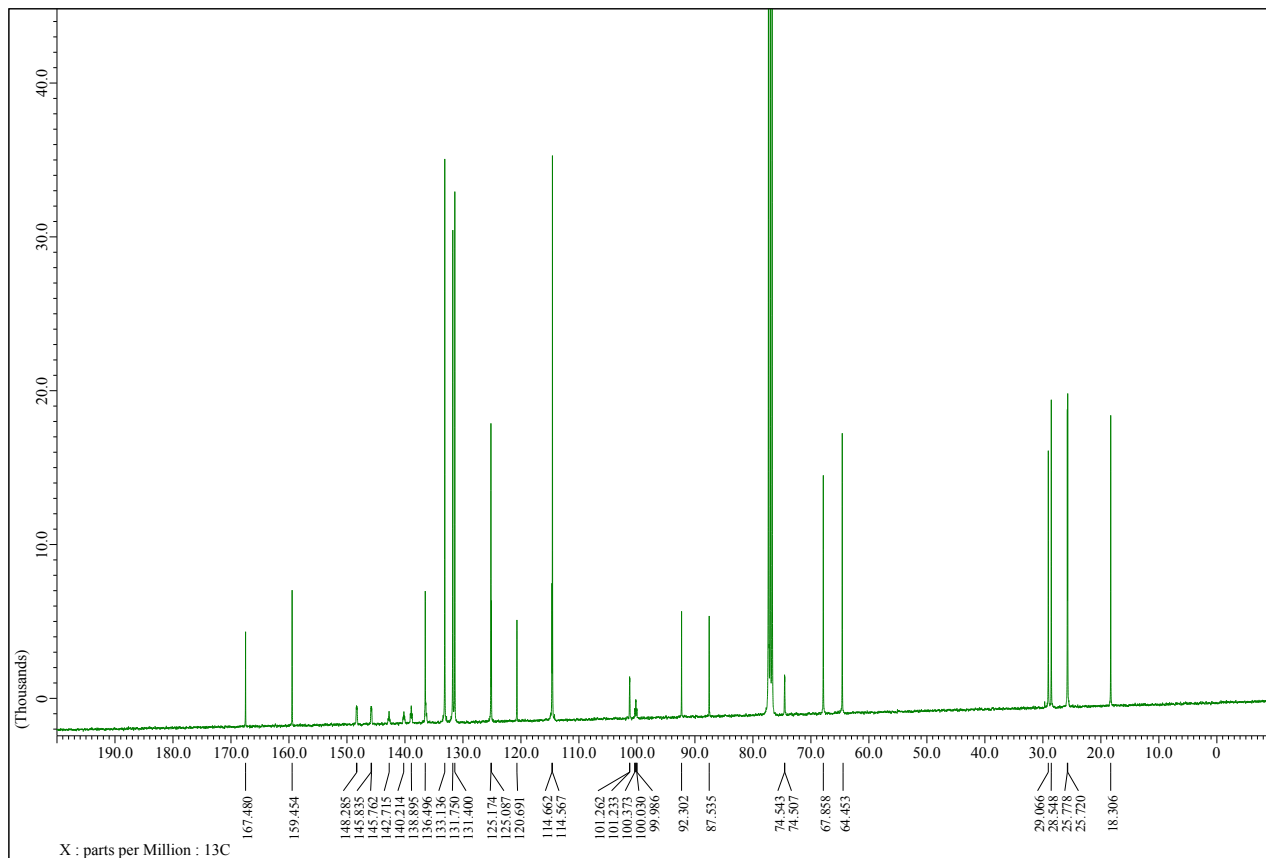

$^{19}\text{F}$  NMR spectrum for **5e** (376 MHz,  $\text{CDCl}_3$ )

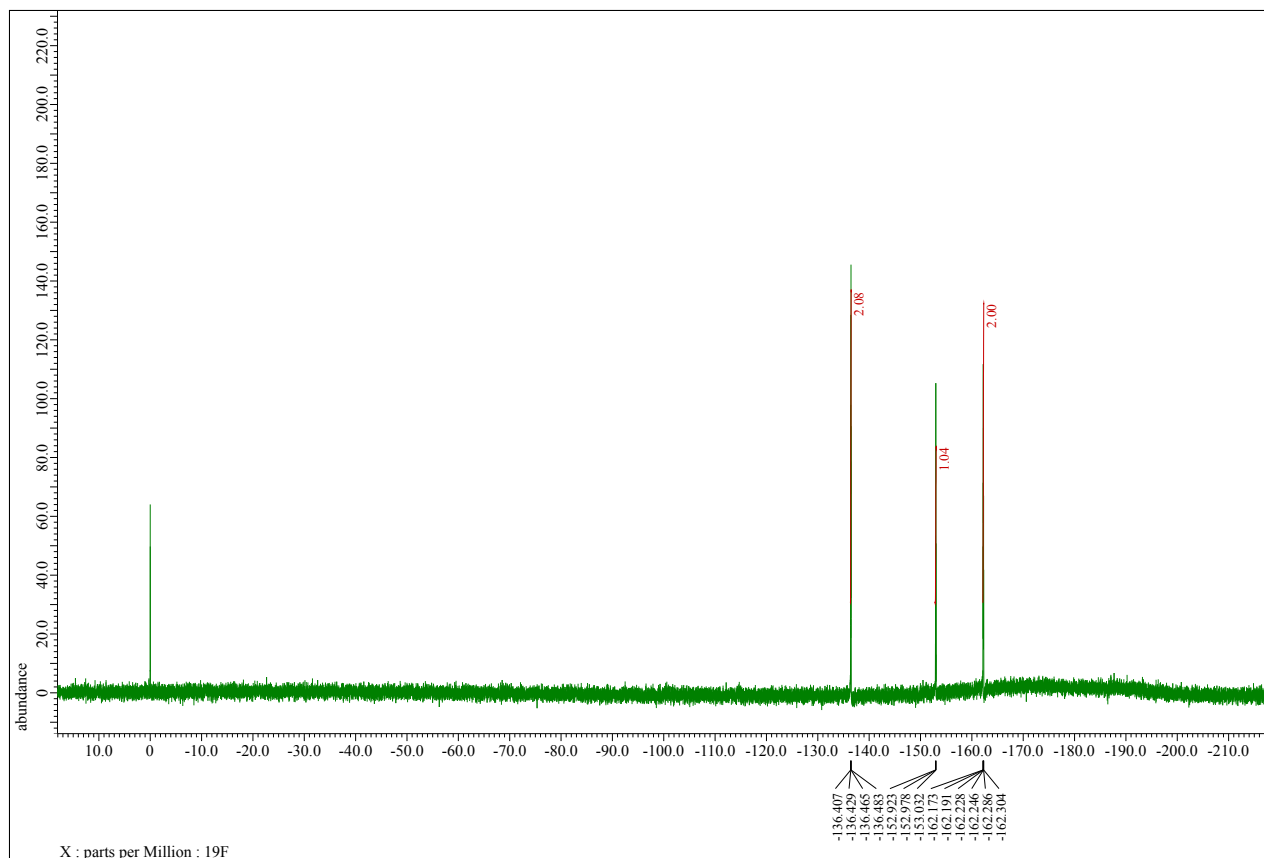

$^1\text{H}$  NMR spectrum for **P-2a** (400 MHz,  $\text{CDCl}_3$ )

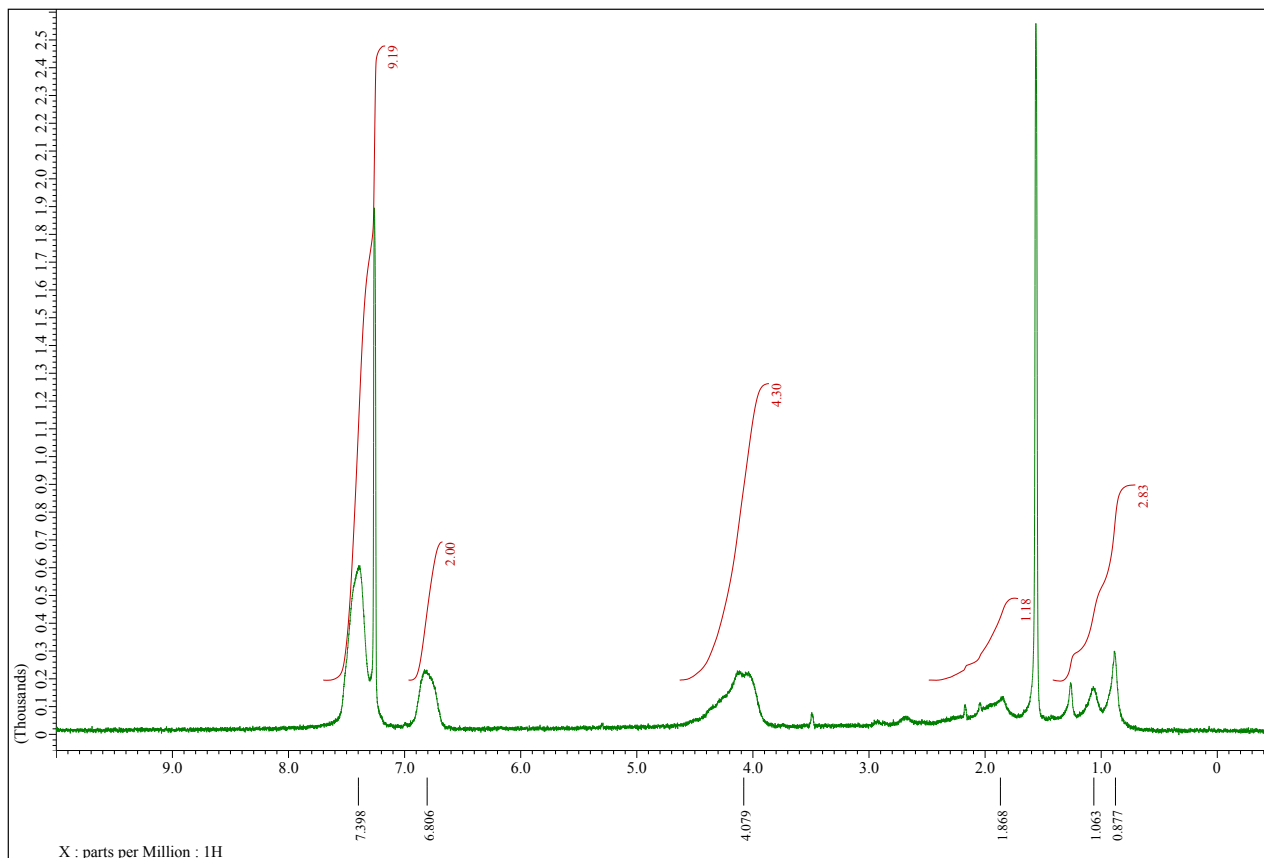

$^{19}\text{F}$  NMR spectrum for **P-2a** (376 MHz,  $\text{CDCl}_3$ )

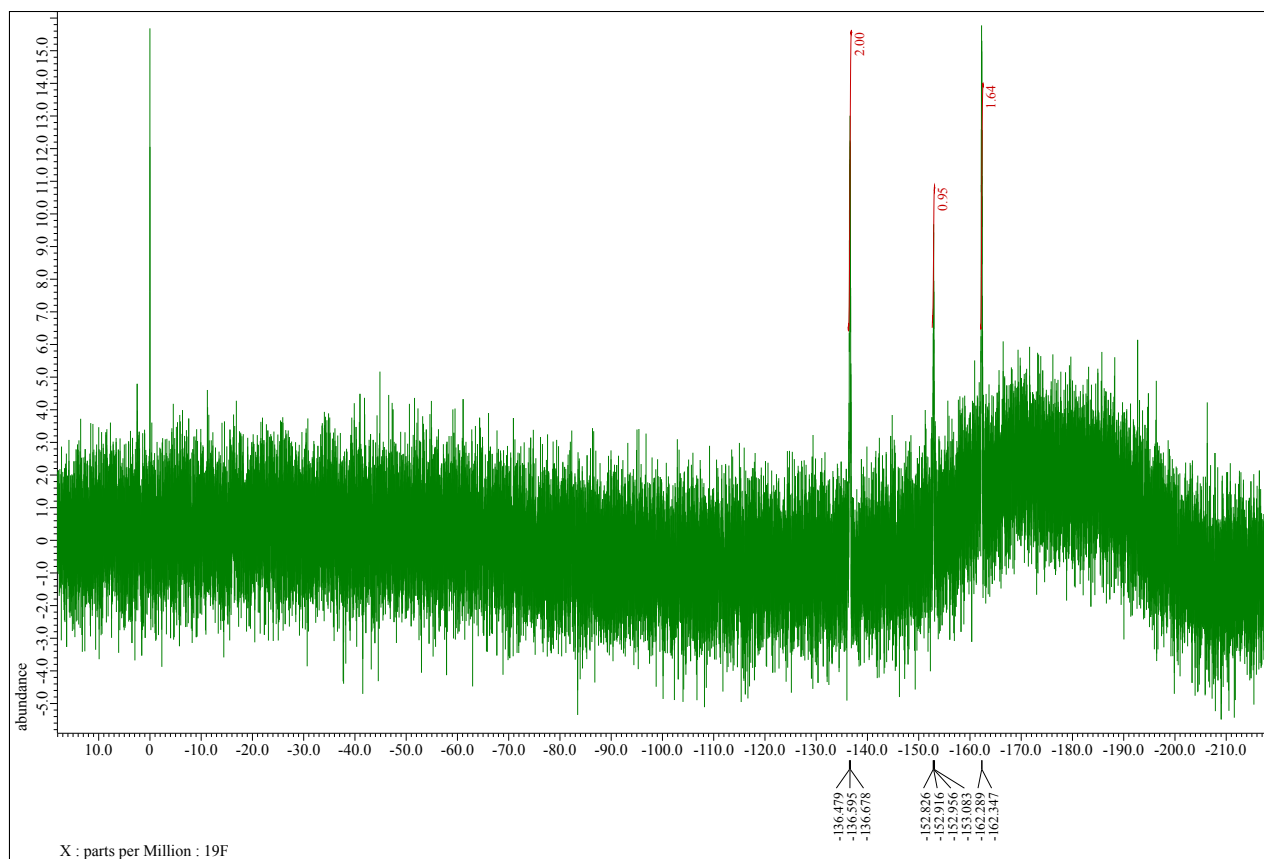

$^1\text{H}$  NMR spectrum for **P-2b** (400 MHz,  $\text{CDCl}_3$ )

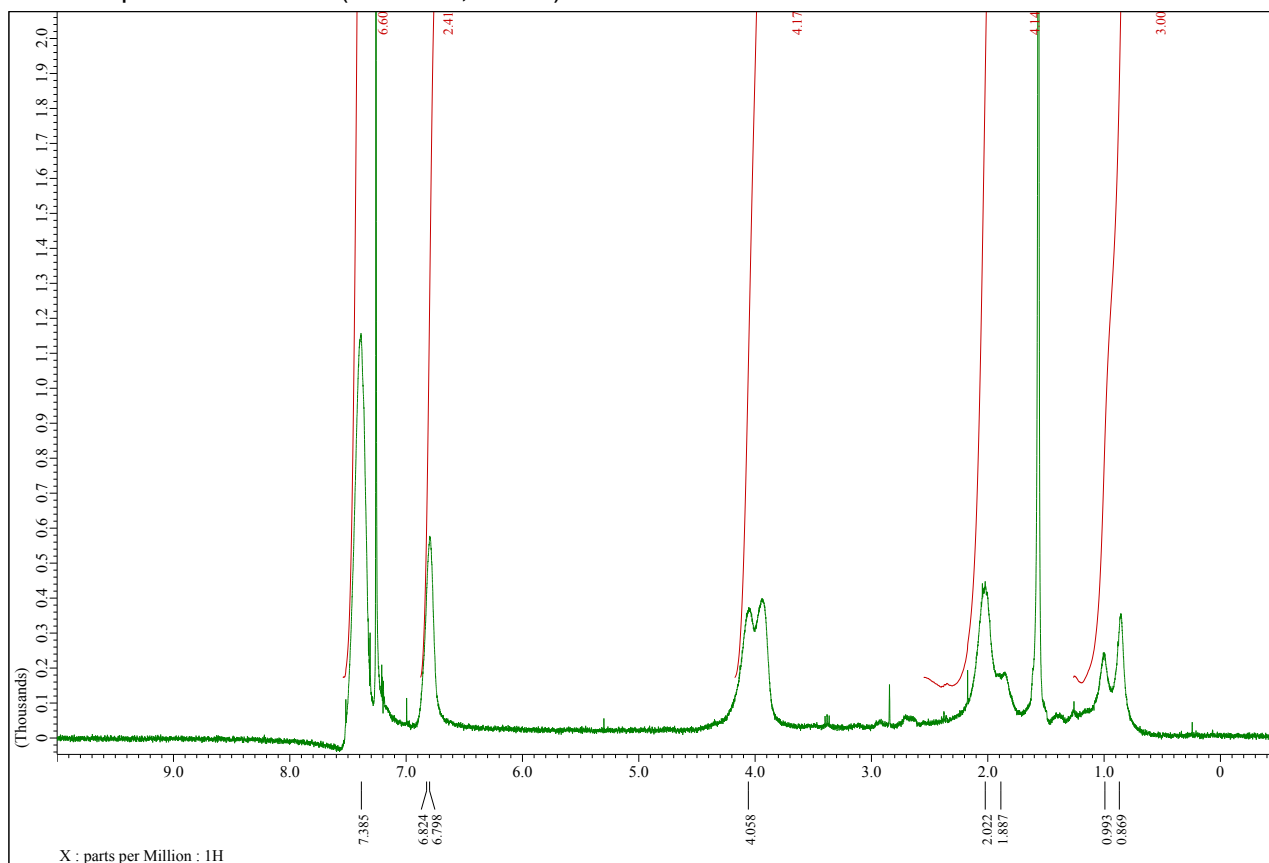

$^{19}\text{F}$  NMR spectrum for **P-2b** (376 MHz,  $\text{CDCl}_3$ )

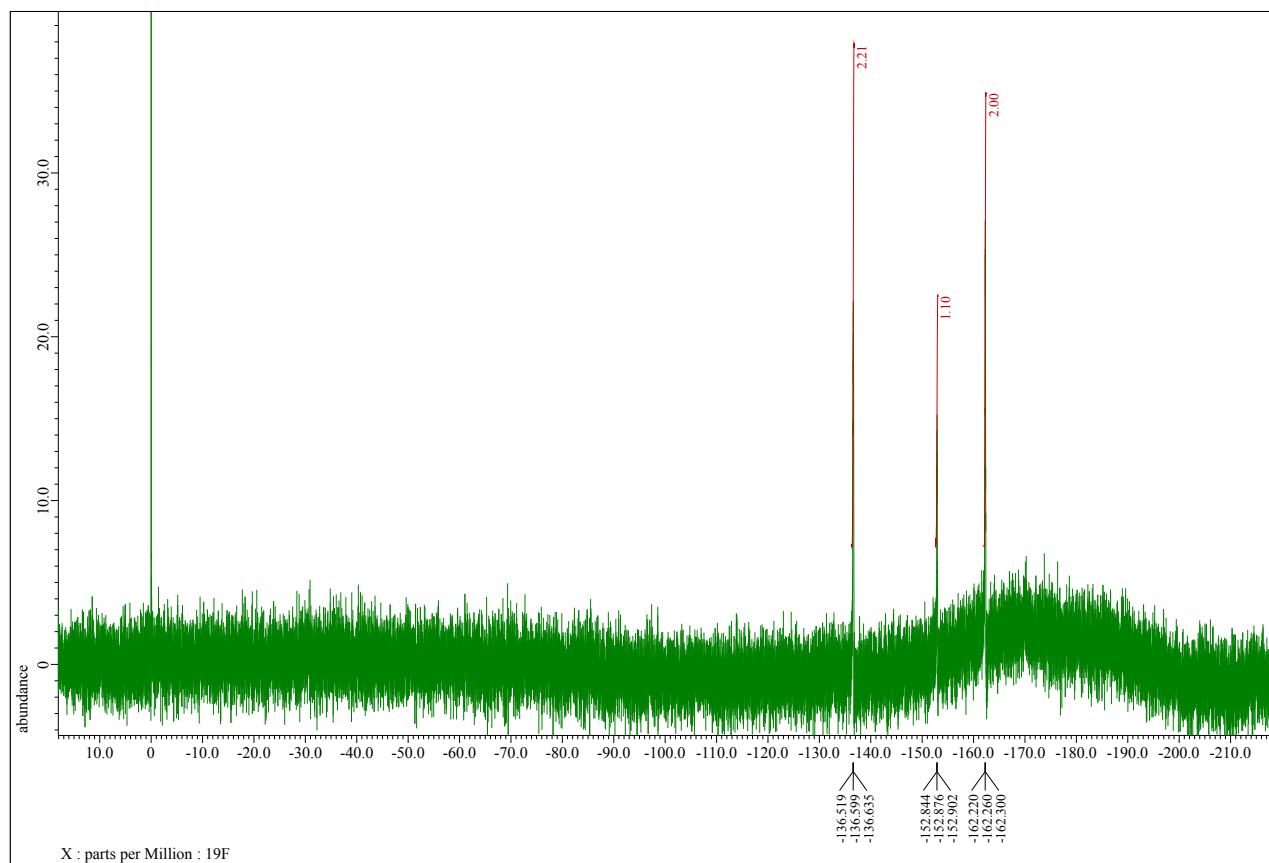

$^1\text{H}$  NMR spectrum for **P-2c** (400 MHz,  $\text{CDCl}_3$ )

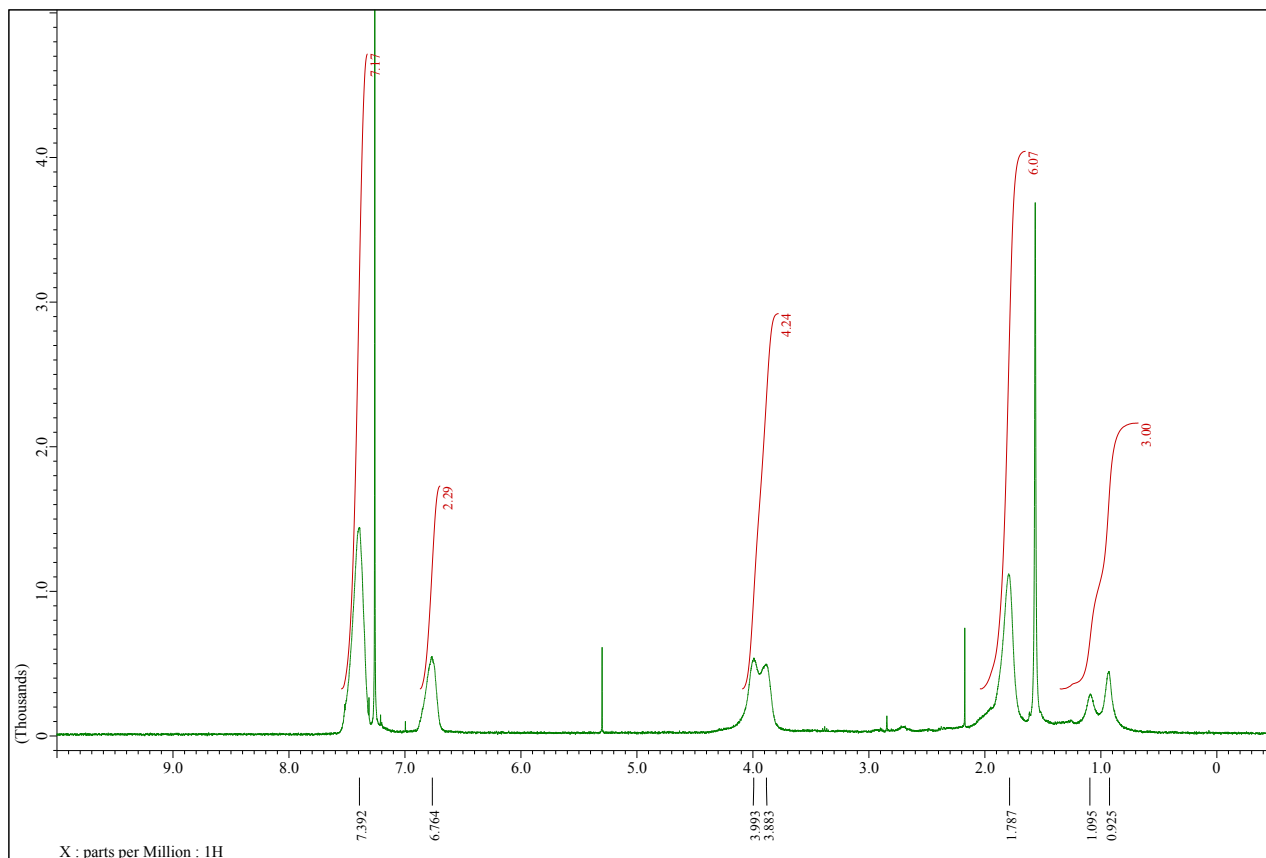

$^{19}\text{F}$  NMR spectrum for **P-2c** (376 MHz,  $\text{CDCl}_3$ )

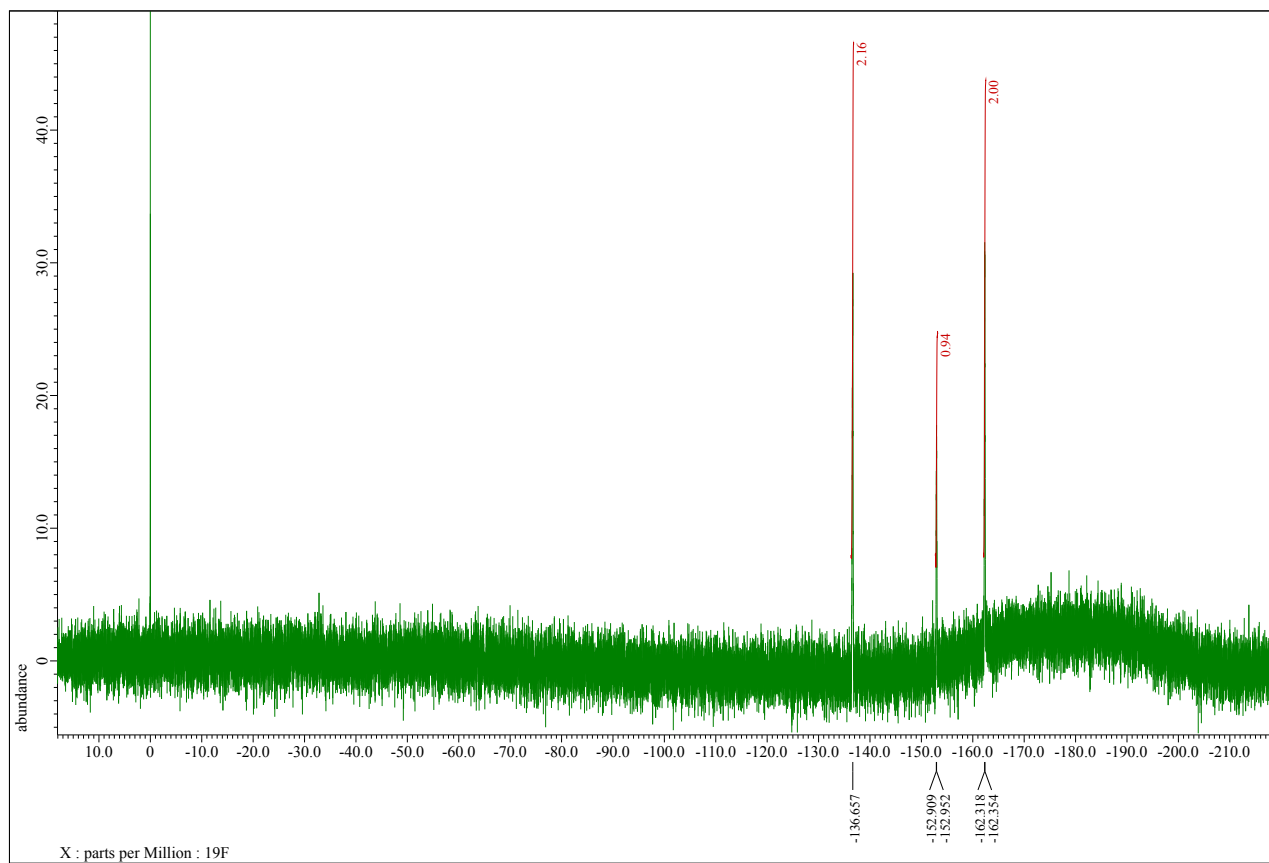

$^1\text{H}$  NMR spectrum for **P-2d** (400 MHz,  $\text{CDCl}_3$ )

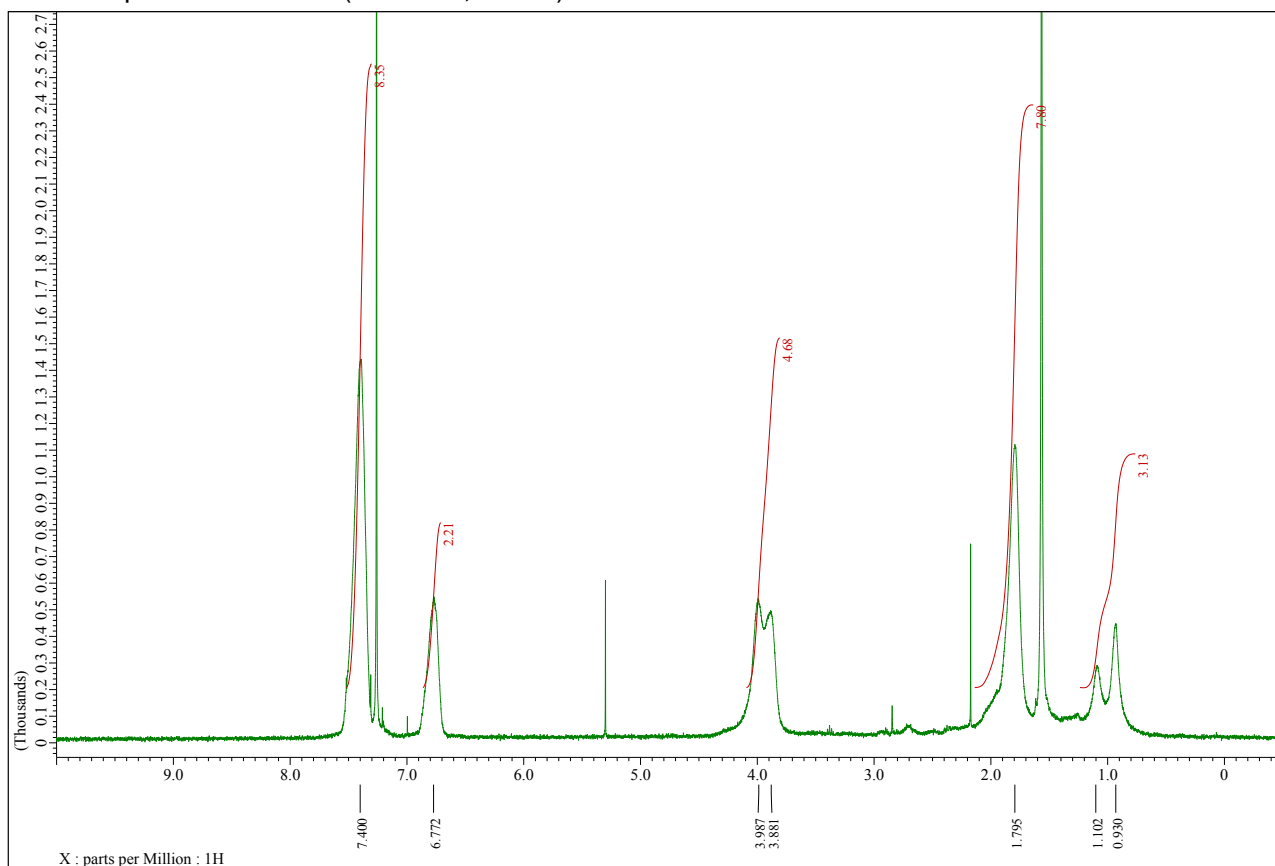

$^{19}\text{F}$  NMR spectrum for **P-2d** (376 MHz,  $\text{CDCl}_3$ )

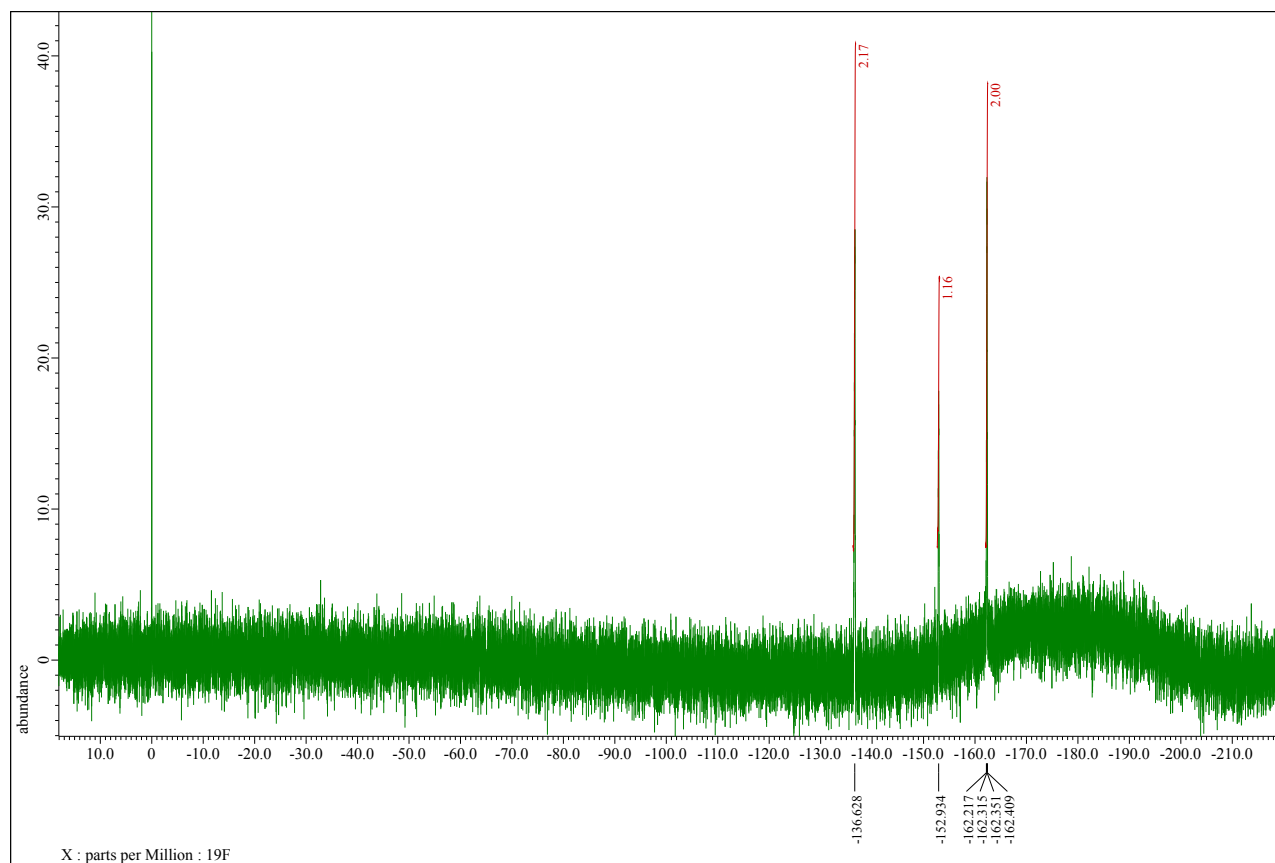



$^1\text{H}$  NMR spectrum for **P-2e** (400 MHz,  $\text{CDCl}_3$ )

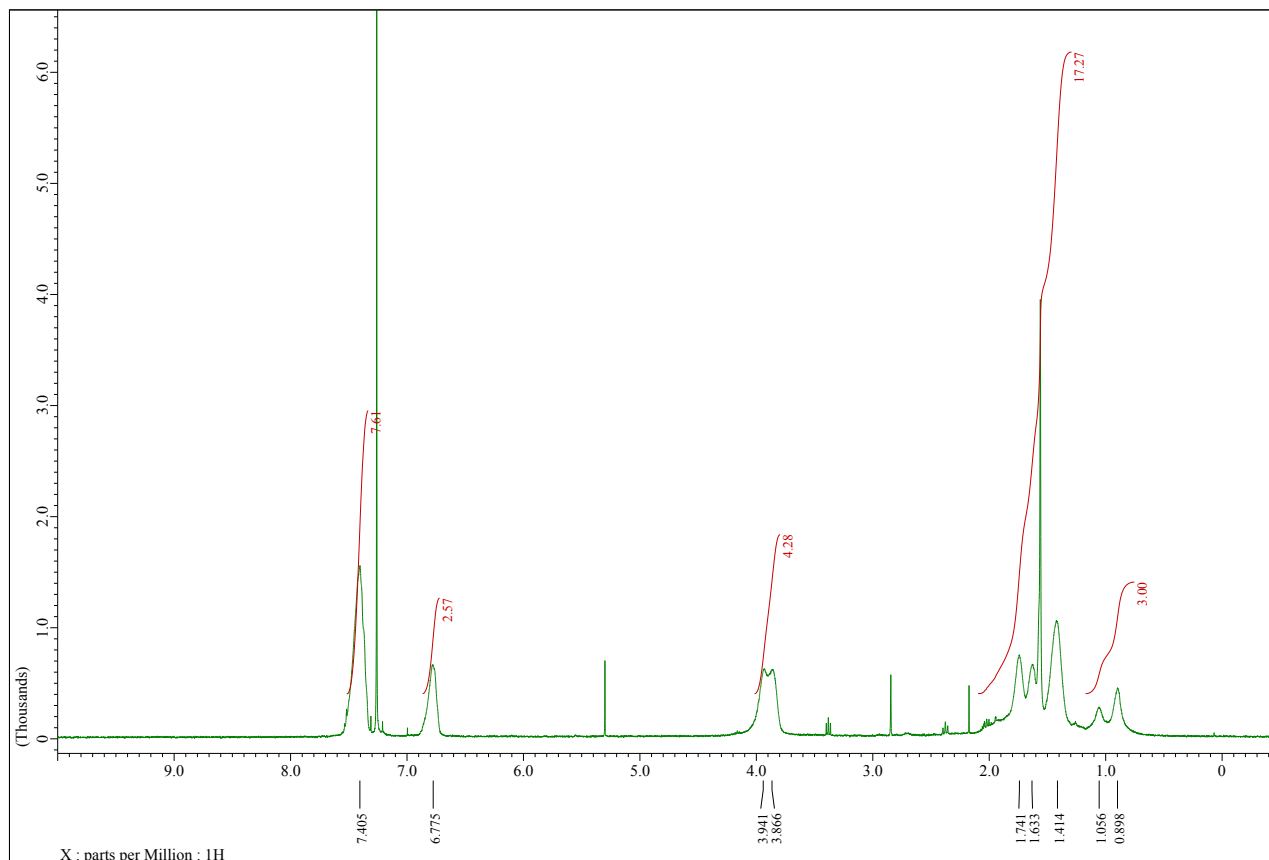

$^{19}\text{F}$  NMR spectrum for **P-2e** (376 MHz,  $\text{CDCl}_3$ )

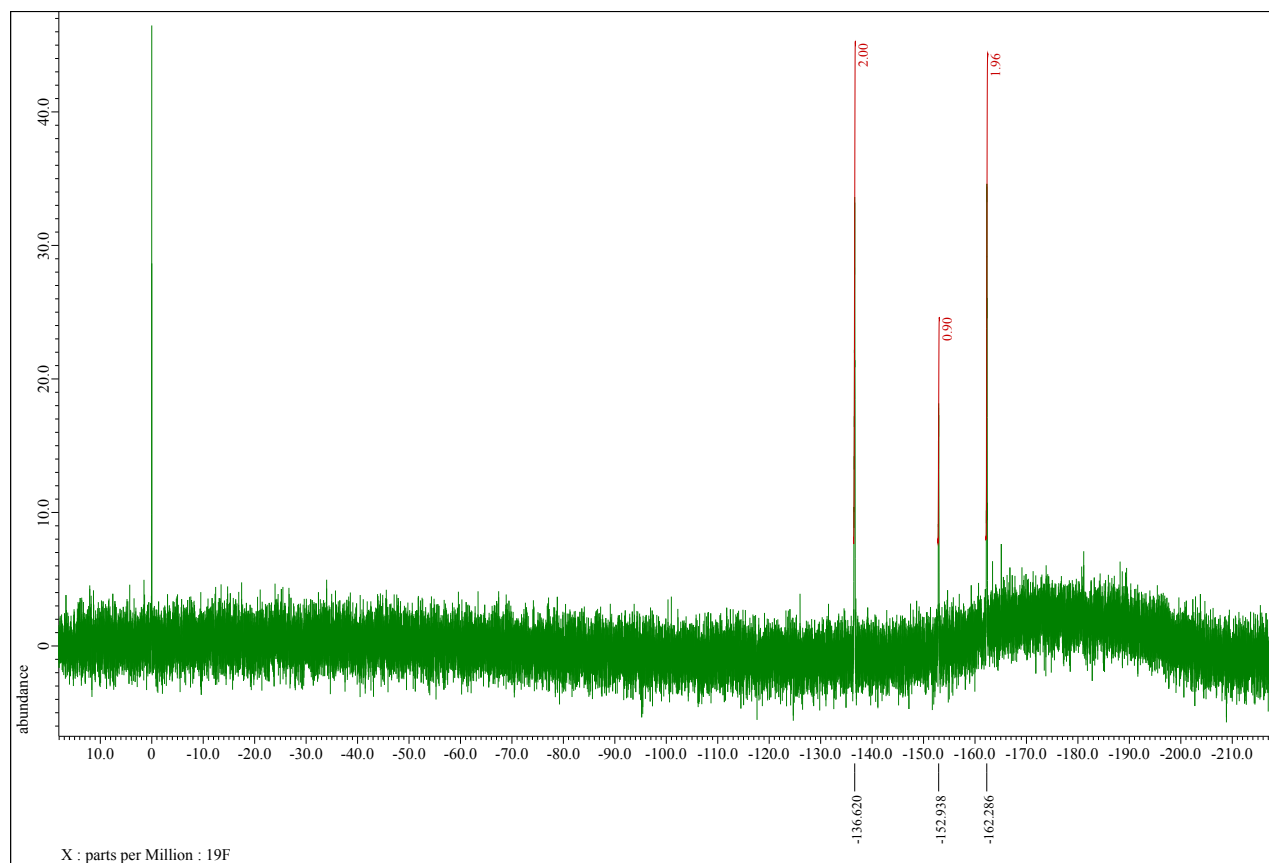

### 3. GPC analysis

**Table S1.** Polymer characterization

|                      | <b>P-2a</b> | <b>P-2b</b> | <b>P-2c</b> | <b>P-2d</b> | <b>P-2e</b> |
|----------------------|-------------|-------------|-------------|-------------|-------------|
| Retention time [min] | 16.188      | 15.558      | 15.262      | 15.205      | 15.12       |
| Peak area [mV • sec] | 6193.277    | 5951.297    | 8355.121    | 4816.097    | 5374.071    |
| Peak height [mV]     | 47.924      | 44.955      | 59.755      | 33.503      | 42.412      |
| FWHM [sec]           | 121.505     | 124.073     | 128.993     | 132.429     | 120.952     |
| $M_n$                | 4818        | 8330        | 9488        | 9566        | 12450       |
| $M_w$                | 7215        | 13213       | 16397       | 16922       | 19104       |
| $M_w/M_n$            | 1.497       | 1.586       | 1.728       | 1.769       | 1.534       |

(a) **P-2a**

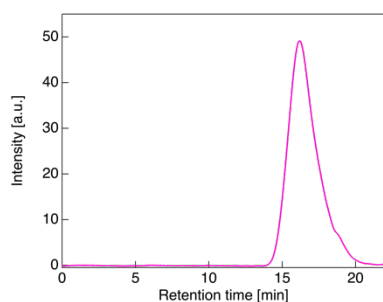

(b) **P-2b**

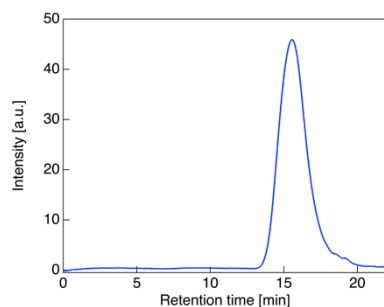

(c) **P-2c**

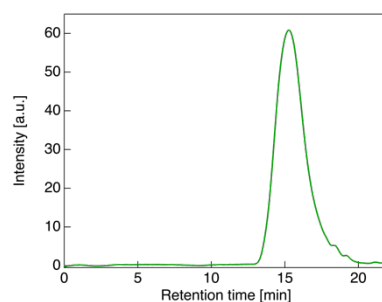

(d) **P-2d**

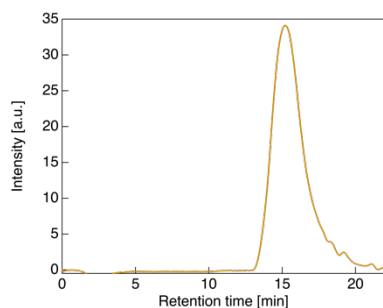

(e) **P-2e**

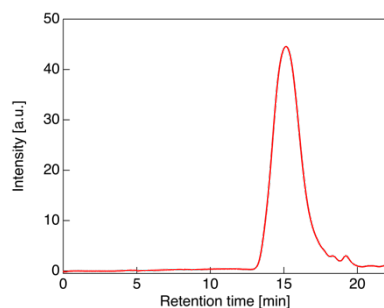

**Figure S1.** Elution curve for **P-2a–e** obtained by GPC analysis (Eluent:  $\text{CHCl}_3$ , standard: polystyrene).

#### 4. Thermogravimetric (TG) analysis

(a) **P-2a**

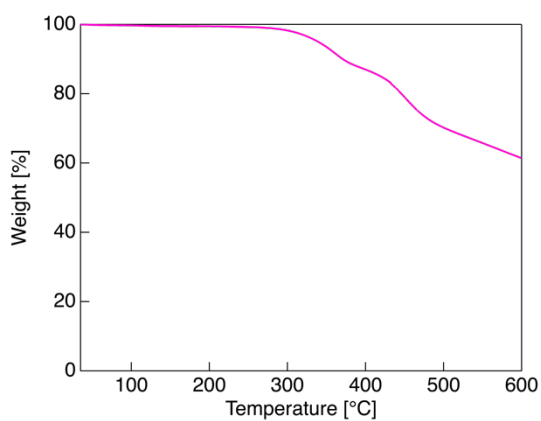

(b) **P-2b**

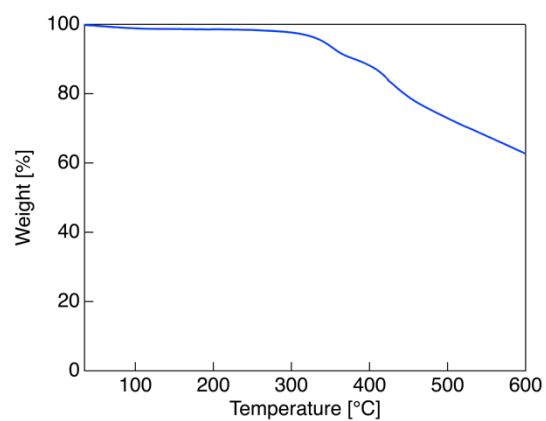

(c) **P-2c**

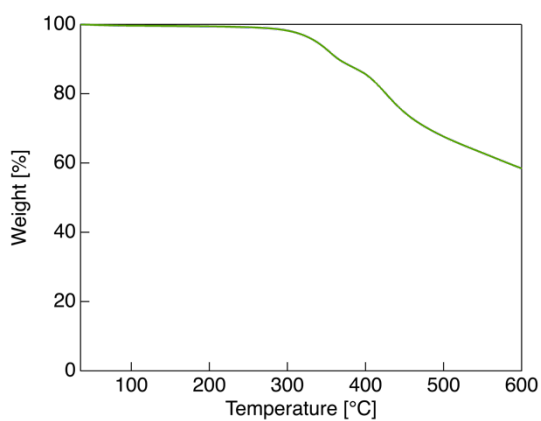

(d) **P-2d**

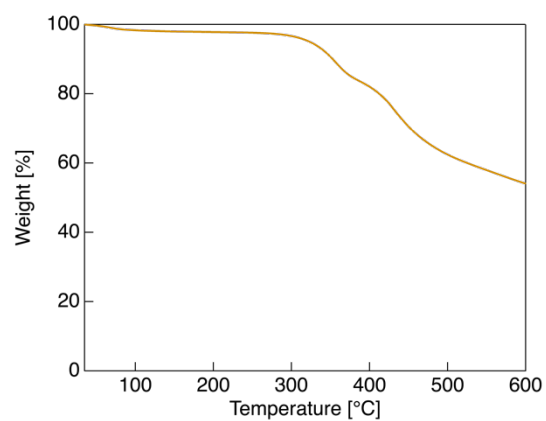

(e) **P-2e**

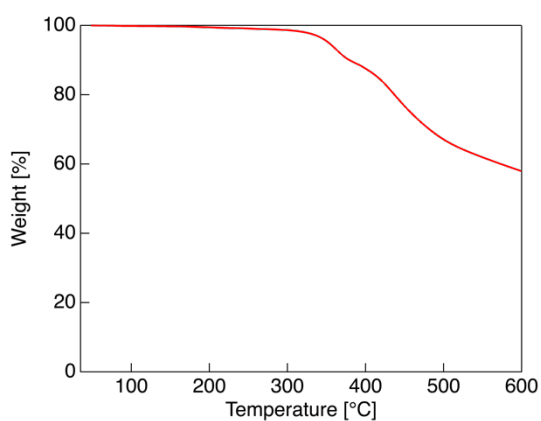

**Figure S2.** Thermograms of **P-2a–e** obtained by TG analysis (heating rate: 10 °C min<sup>-1</sup>).

## 5. Differential scanning calorimetry (DSC) measurement

(a) **P-2a**

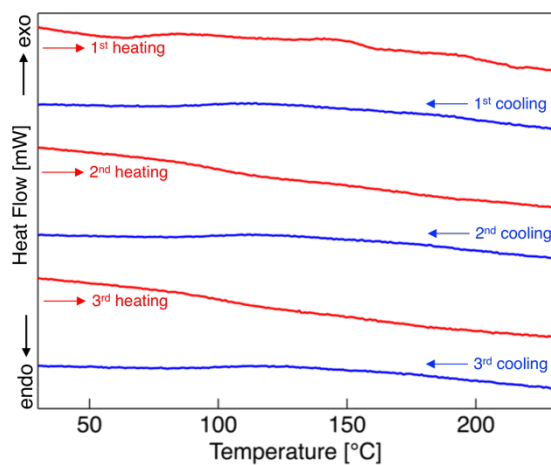

(b) **P-2b**

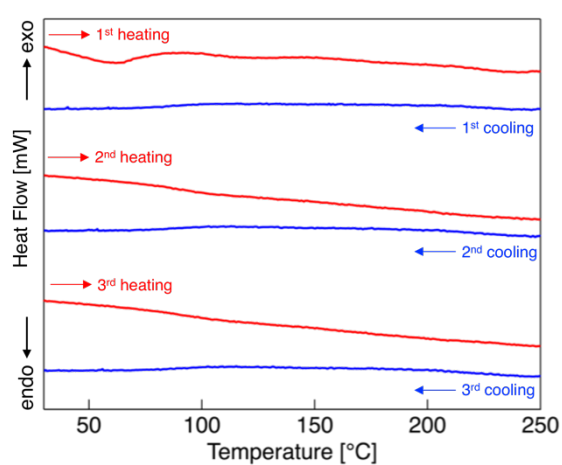

(c) **P-2c**

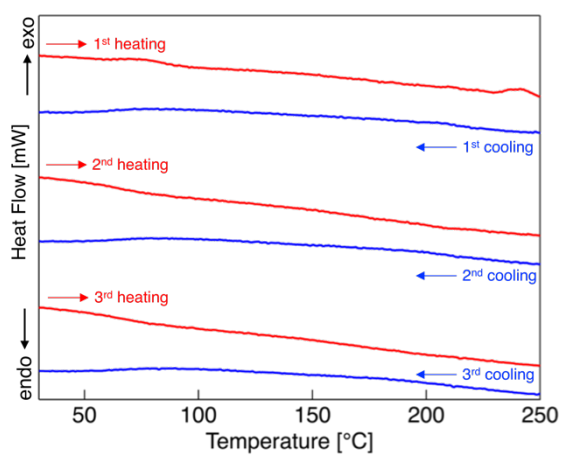

(d) **P-2d**

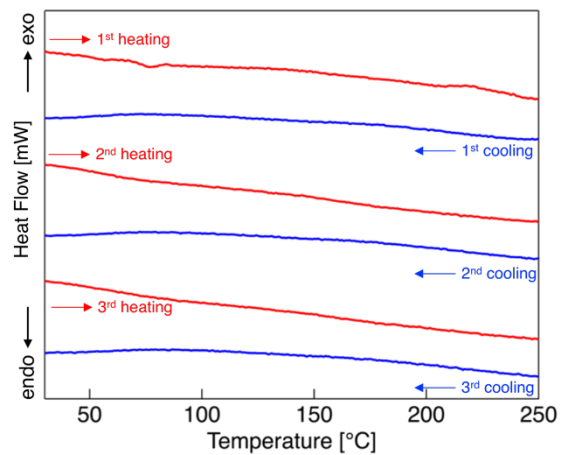

(e) **P-2e**

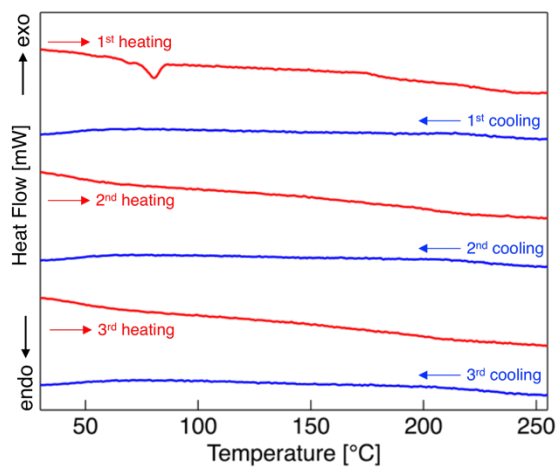

**Figure S3.** Thermograms of **P-2a–e** obtained by DSC (scan rate: 5.0 °C min<sup>-1</sup>).

## 6. Polarizing optical microscopy (POM) measurement

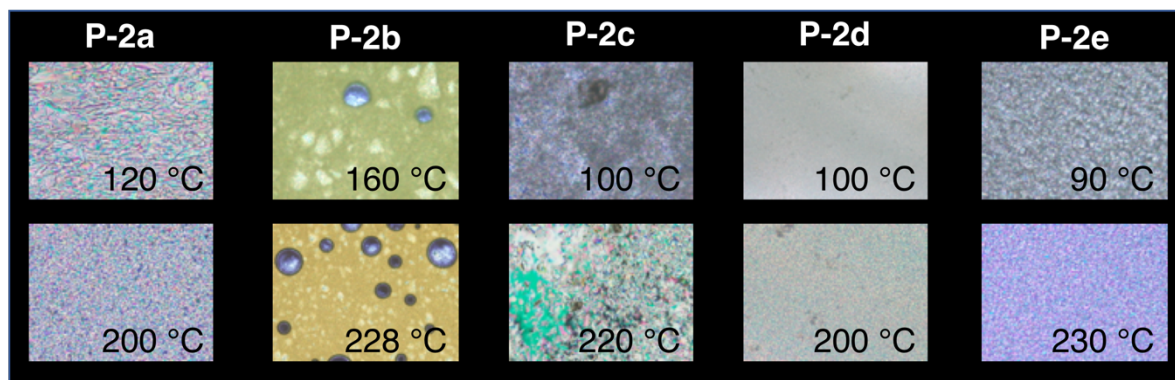

**Figure S4.** Microphotographs obtained by POM measurement

## 7. PXRD measurement for the LC phases (at 150 °C)

(a) **P-2a**

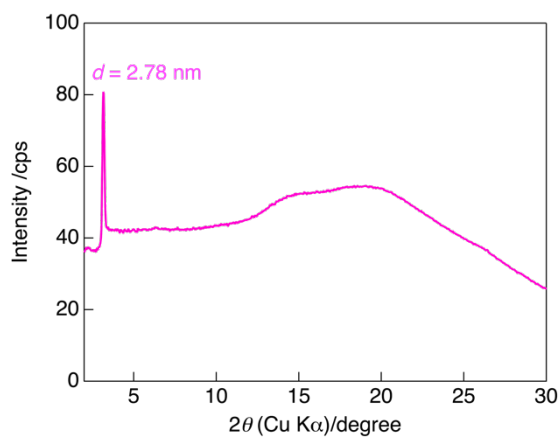

(b) **P-2b**

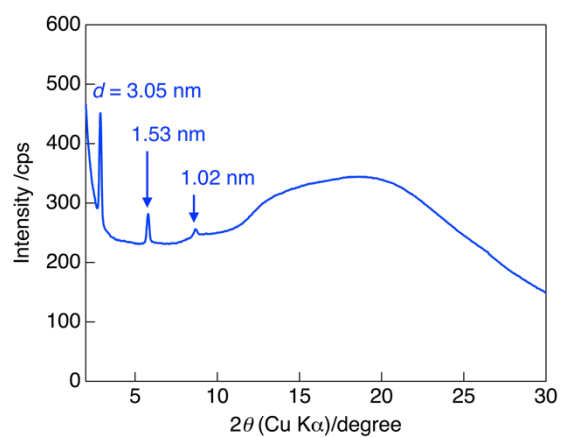

(c) **P-2c**

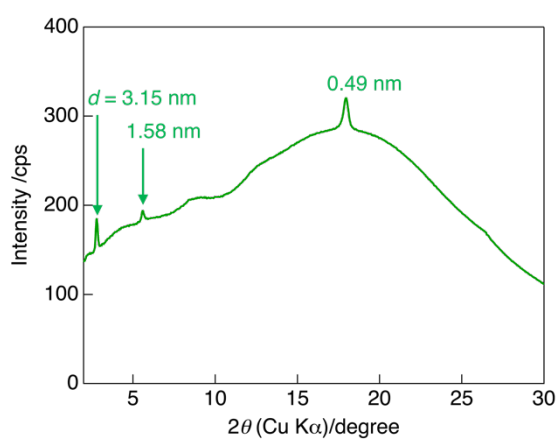

(d) **P-2d**

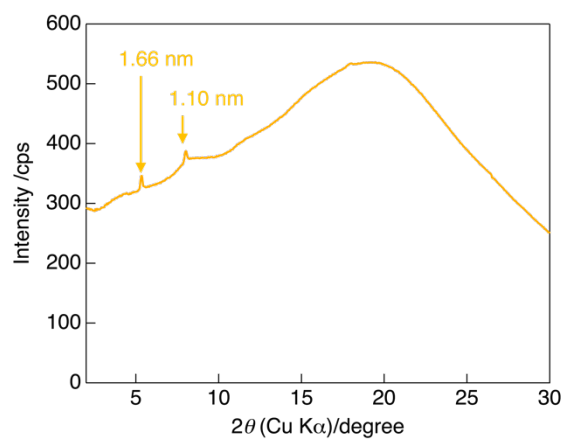

(e) **P-2e**

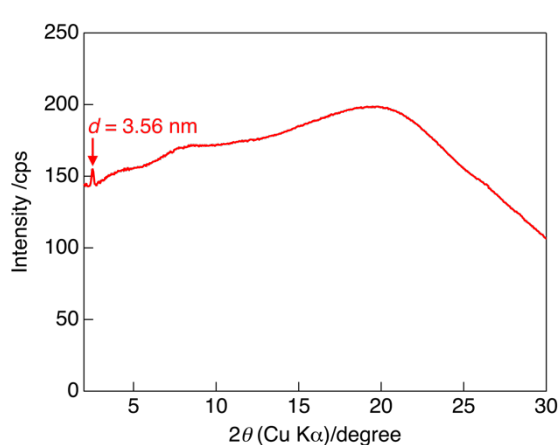

(f) number of alkylene linkage vs  $d$  spacing

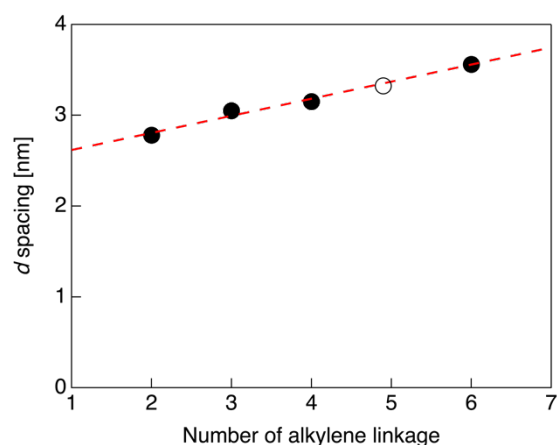

**Figure S5.** (a–e) PXRD pattern and (f) relationship between the number of alkylene linkage and interlayer  $d$  spacing of **P-2a–e** observed at 150 °C on the cooling process.

## 8. Photophysical properties in CH<sub>2</sub>Cl<sub>2</sub> solution

(a) **P-2a**

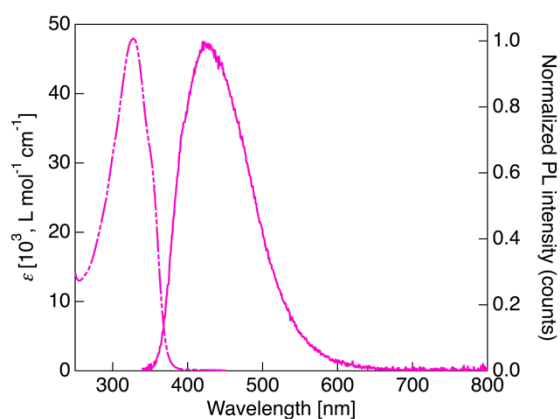

(b) **P-2b**

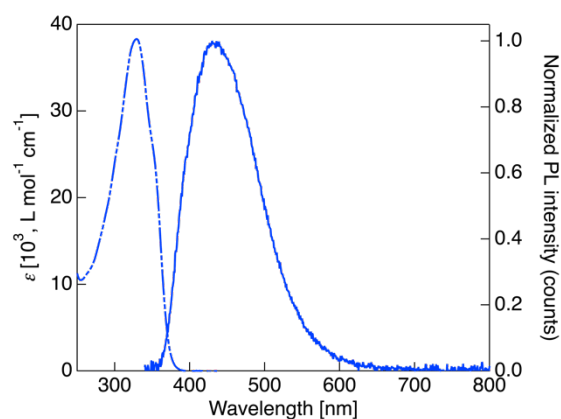

(c) **P-2c**

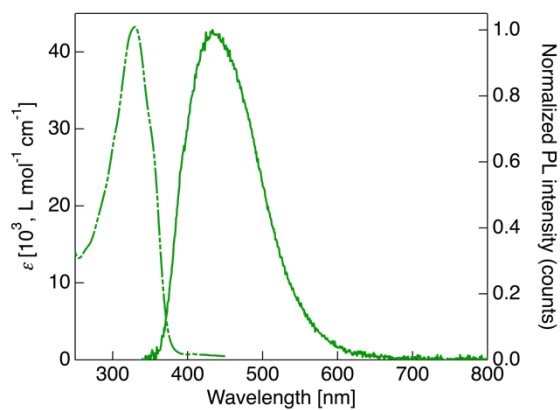

(d) **P-2d**

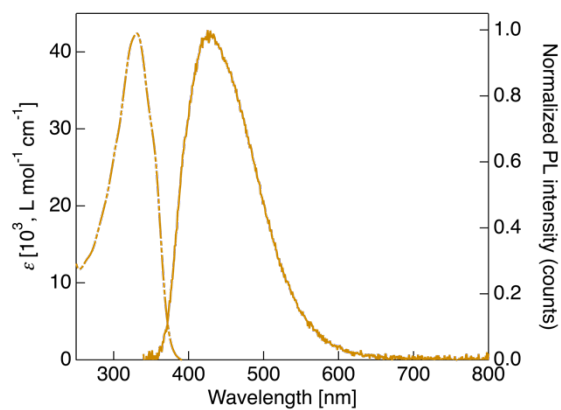

(e) **P-2e**

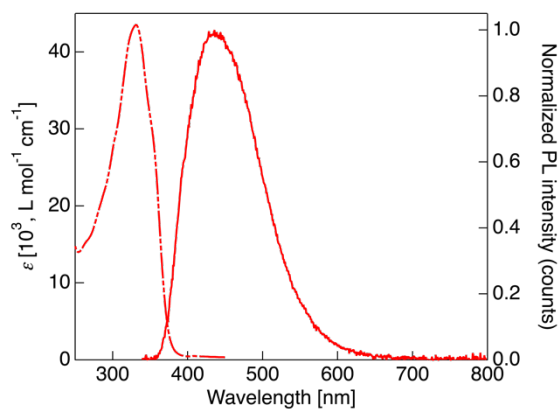

**Figure S6.** Absorption (dotted line) and PL spectra (solid line,  $\lambda_{\text{ex}} = 330$  nm) for **P-2a–e** in CH<sub>2</sub>Cl<sub>2</sub> solution (concentration:  $1.0 \times 10^{-5}$  mol L<sup>-1</sup> for absorption;  $1.0 \times 10^{-6}$  mol L<sup>-1</sup> for PL).

## 9. Photophysical properties of P-2e in various solvent

(a) in  $\text{CHCl}_3$

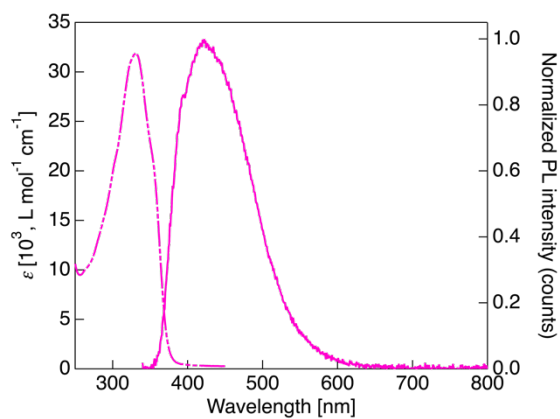

(b) in AcOEt

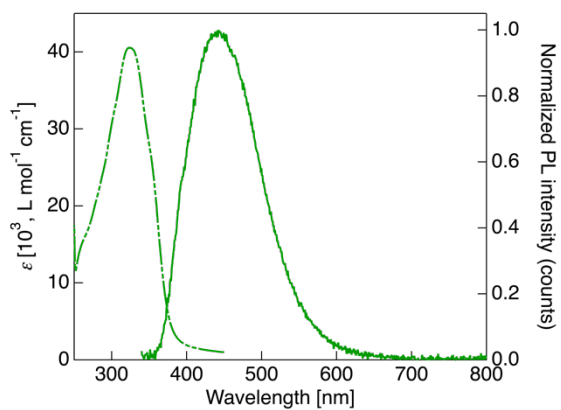

(c) in THF

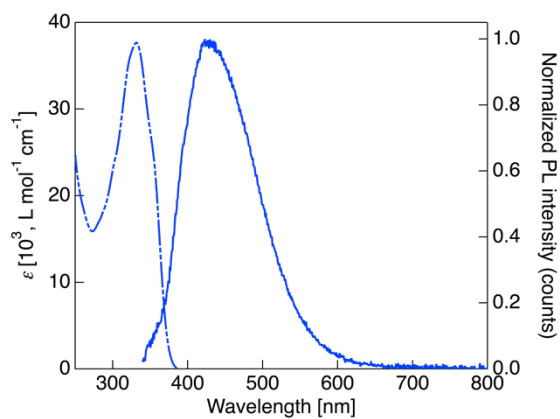

(d) in DMF

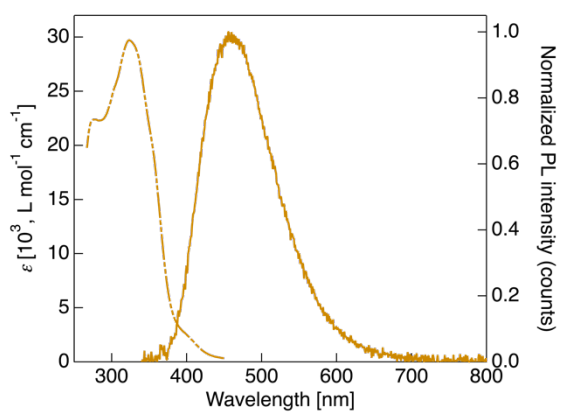

**Figure S7.** Absorption (dotted line) and PL spectra (solid line,  $\lambda_{\text{ex}} = 330 \text{ nm}$ ) for **P-2e** in (a)  $\text{CHCl}_3$ , (b) AcOEt, (c) THF, and (d) DMF solution (concentration:  $1.0 \times 10^{-5} \text{ mol L}^{-1}$  for absorption;  $1.0 \times 10^{-6} \text{ mol L}^{-1}$  for PL).



## 10. Photophysical properties in the pristine powder solid

(a) **P-2a** ( $\lambda_{\text{em}} = 485 \text{ nm}$ ,  $\lambda_{\text{ex}} = 360 \text{ nm}$ )

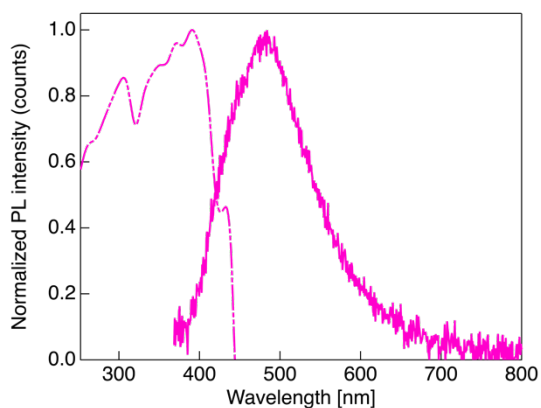

(b) **P-2b** ( $\lambda_{\text{em}} = 470 \text{ nm}$ ,  $\lambda_{\text{ex}} = 360 \text{ nm}$ )

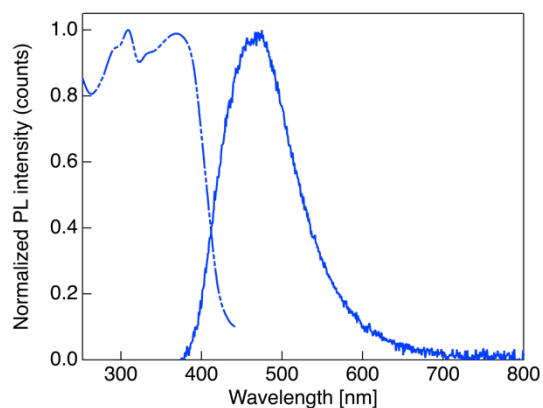

(c) **P-2c** ( $\lambda_{\text{em}} = 470 \text{ nm}$ ,  $\lambda_{\text{ex}} = 360 \text{ nm}$ )

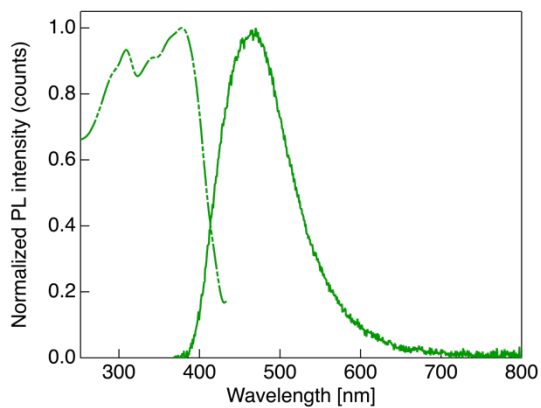

(d) **P-2d** ( $\lambda_{\text{em}} = 480 \text{ nm}$ ,  $\lambda_{\text{ex}} = 360 \text{ nm}$ )

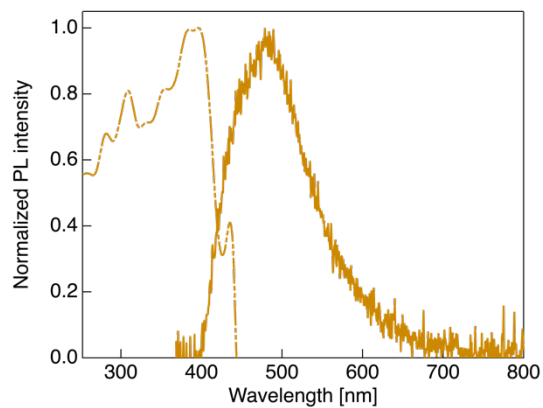

(e) **P-2e** ( $\lambda_{\text{em}} = 475 \text{ nm}$ ,  $\lambda_{\text{ex}} = 360 \text{ nm}$ )

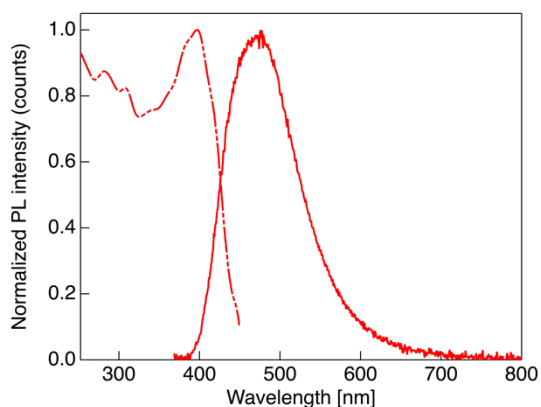

**Figure S8.** Excitation (dotted line) and PL spectra (solid line) for **P-2a–e** in the pristine powder solid.

## 11. Photophysical properties of $P_{B-D-2e}$ with various $M_n$ and PDI in the pristine powder solid

(a)  $P_B-2e$  ( $\lambda_{em} = 460$  nm,  $\lambda_{ex} = 360$  nm)

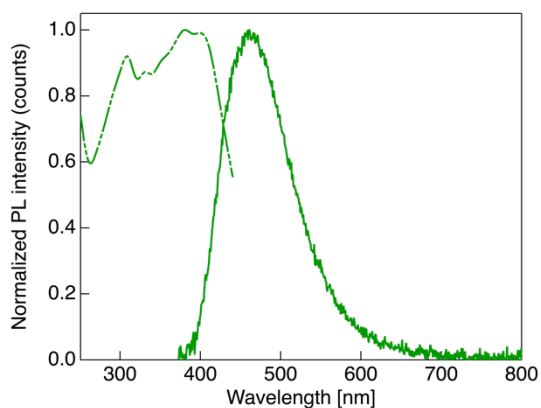

(b)  $P_C-2e$  ( $\lambda_{em} = 470$  nm,  $\lambda_{ex} = 360$  nm)

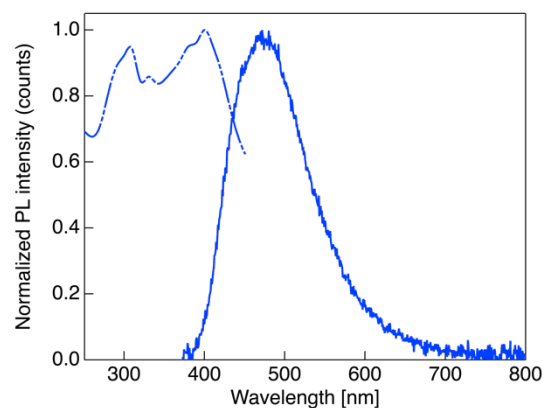

(c)  $P_D-2e$  ( $\lambda_{em} = 465$  nm,  $\lambda_{ex} = 360$  nm)

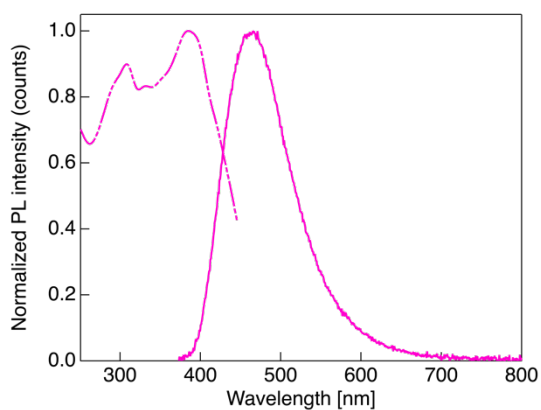

**Figure S9.** Excitation (dotted line) and PL spectra (solid line) for  $P-2e$  with various  $M_n$  and PDI in the pristine solid states.

## 12. Photophysical property of P-2a–e in the N phase

(a) **P-2a** ( $\lambda_{em} = 485$  nm,  $\lambda_{ex} = 310$  nm)

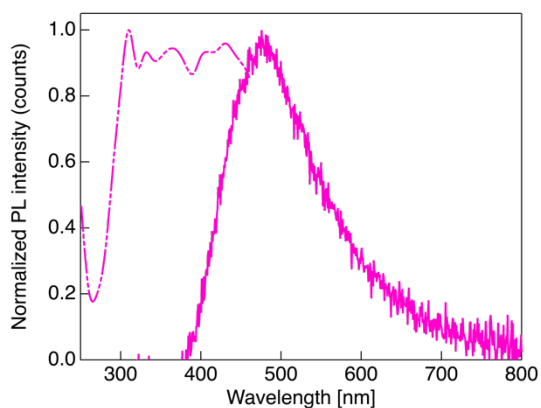

(b) **P-2b** ( $\lambda_{em} = 490$  nm,  $\lambda_{ex} = 310$  nm)

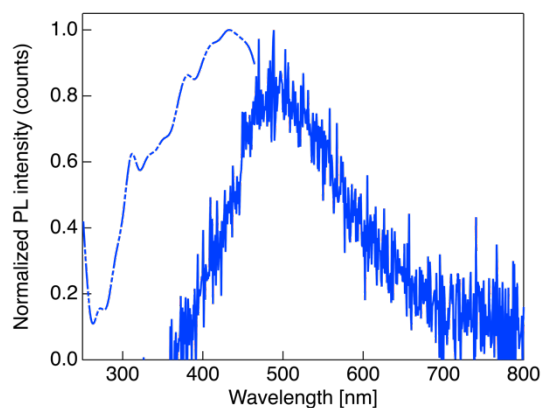

(c) **P-2c** ( $\lambda_{em} = 485$  nm,  $\lambda_{ex} = 310$  nm)

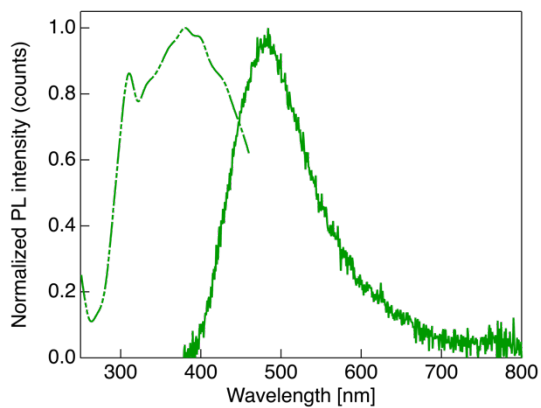

(d) **P-2d** ( $\lambda_{em} = 490$  nm,  $\lambda_{ex} = 310$  nm)

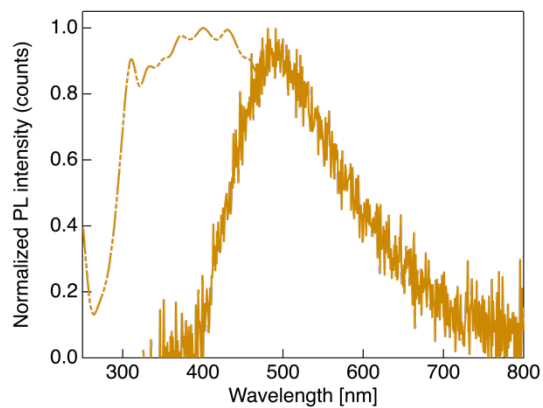

(e) **P-2e** ( $\lambda_{em} = 490$  nm,  $\lambda_{ex} = 310$  nm)

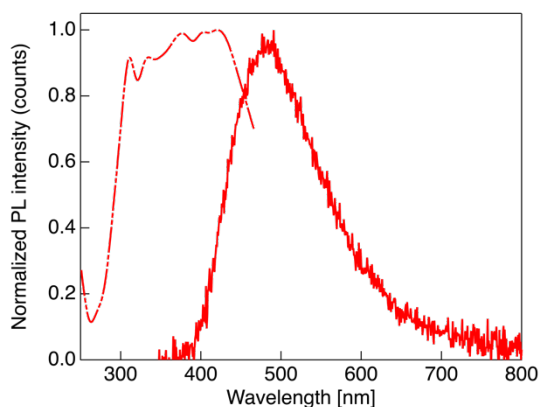

**Figure S10.** Excitation (dotted line) and PL spectra (solid line) for **P-2a–e** in the Sm phase (150 °C).

### 13. Comparison for photophysical properties of P-2 in CH<sub>2</sub>Cl<sub>2</sub>, solid, and Sm LC phases

(a) **P-2a**

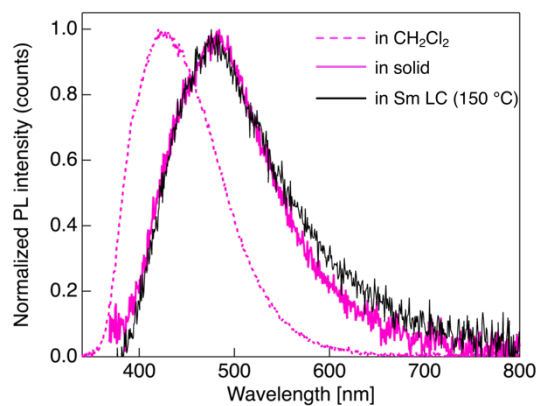

(b) **P-2b**

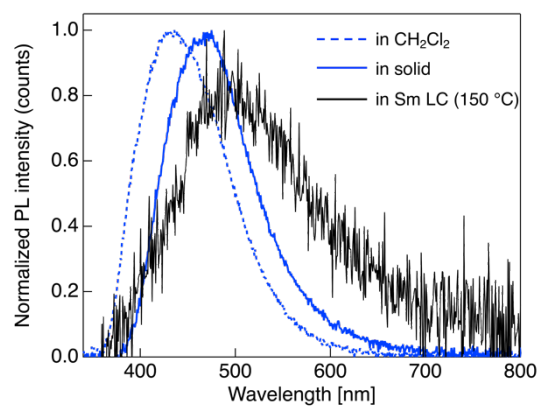

(c) **P-2c**

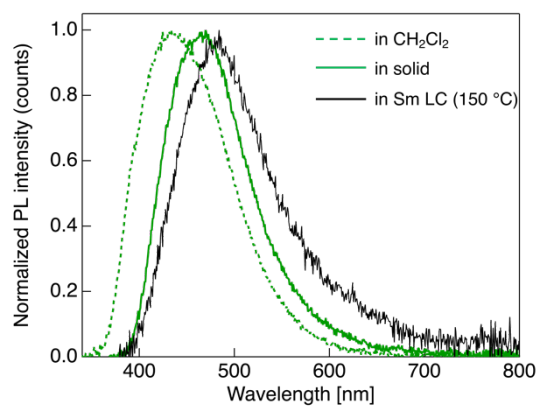

(d) **P-2d**

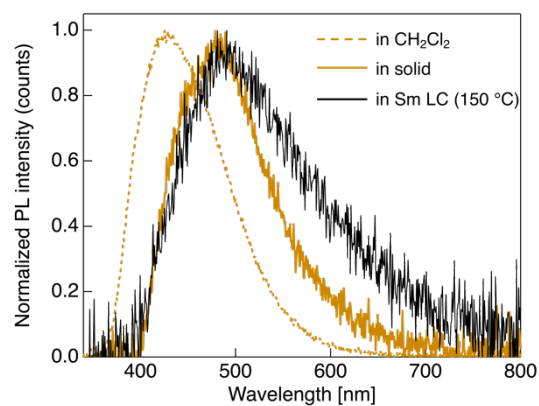

(e) **P-2e**

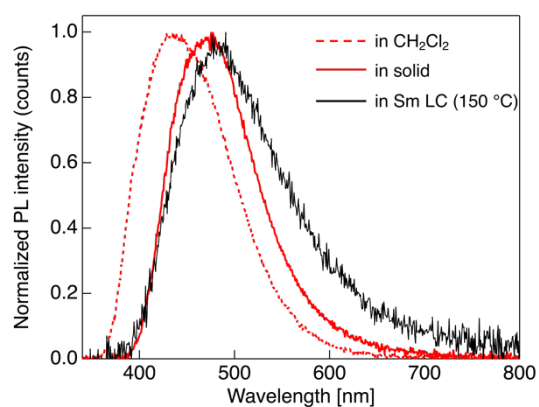

**Figure S11.** PL spectra in CH<sub>2</sub>Cl<sub>2</sub> solution (dotted line,  $\lambda_{\text{ex}} = 330$  nm), in pristine powder solid (solid line,  $\lambda_{\text{ex}} = 360$  nm), and in Sm LC phase at 150 °C (black solid line,  $\lambda_{\text{ex}} = 310$  nm) for **P-2a–e**.
